1  
2  
3

4

5 Persistent Chikungunya Virus Replication in Human Cells is  
6 Associated with Presence of Stable Cytoplasmic Granules  
7 Containing Non-structural Protein 3

8  
9  
10

11 Roland Remenyi<sup>a</sup>, Yanni Gao<sup>a</sup>, Ruth E Hughes<sup>b</sup>, Alistair Curd<sup>b</sup>, Carsten Zothner<sup>a</sup>,  
12 Michelle Peckham<sup>b</sup>, Andres Merits<sup>b</sup>, Mark Harris<sup>a,b,#</sup>

13

14

15 School of Molecular and Cellular Biology, Faculty of Biological Sciences, University of  
16 Leeds, Leeds, United Kingdom<sup>a</sup>; Astbury Centre for Structural Molecular Biology,  
17 University of Leeds, Leeds, United Kingdom<sup>b</sup>; Institute of Technology, University of  
18 Tartu, Tartu, Estonia<sup>c</sup>

19

20 Running Head: Persistence of NsP3 during Stable CHIKV Replication

21

22 #Address correspondence to Mark Harris, M.Harris@leeds.ac.uk.

23

24 Abstract Word Count: 240 Abstract, 141 Importance

25 Text Word Count: 5500

## 26 **Abstract**

27 Chikungunya virus (CHIKV), a mosquito-borne human pathogen, causes a disabling  
28 disease characterized by severe joint pain that can persist for weeks, months or even  
29 years in patients. The non-structural protein 3 (nsP3) plays essential roles during acute  
30 infection, but little is known about the function of nsP3 during chronic disease. Here, we  
31 used sub-diffraction multi-color microscopy for a spatial and temporal analysis of CHIKV  
32 nsP3 within human cells that persistently replicate viral RNA. Round cytoplasmic  
33 granules of various sizes (i) contained nsP3 and G3BP Stress Granule Assembly factor;  
34 (ii) were next to double-stranded RNA foci, and nsP1-positive structures; and (iii) made  
35 contact with markers of the cytoskeleton and cellular structures, such as early  
36 endosomes and nucleopores. Analysis of protein turnover and mobility by live-cell  
37 microscopy revealed that granules could persist for hours to days, can accumulate  
38 newly synthesized protein, and move at differently through the cytoplasm. Granules also  
39 had a static internal architecture and were stable in cell lysates. Whereas cells with  
40 active replication and stable nsP3-granules did not respond to oxidative stress,  
41 refractory cells that had cleared the non-cytotoxic replicon could. In summary, nsP3 can  
42 form uniquely stable granular structures that persist long-term within the host cell. This  
43 continued presence of viral and cellular protein-complexes has implications for the study  
44 of the pathogenic consequences of lingering CHIKV infection and the development of  
45 strategies to mitigate the burden of chronic musculoskeletal disease brought about by a  
46 medically important arthropod-borne virus (arbovirus).

47 **Importance**

48 Chikungunya virus (CHIKV) is a re-emerging alphavirus transmitted by mosquitos and  
49 causes widespread transient sickness but also chronic disease affecting muscles and  
50 joints. Although no approved vaccines or antivirals are available, a better understanding  
51 of the viral life cycle and the role of individual viral proteins can aid in identifying new  
52 therapeutic targets. Advances in microscopy and persistent CHIKV model systems now  
53 allow researchers to study viral proteins within controlled laboratory environments. Here  
54 we established human cells that stably replicate viral RNA and express a tagged  
55 version of non-structural protein 3. The ability to track this viral protein within the host  
56 cell and during persistent replication can benefit fundamental research efforts to better  
57 understand long-term consequences of the persistence of viral protein complexes and  
58 thereby provide the foundation for new therapeutic targets to control CHIKV infection  
59 and treat chronic disease symptoms.

60

61

62

63

64

65

66

## 67 **Introduction**

68 Chikungunya virus (CHIKV), a re-emerging arbovirus of the Alphavirus genus,  
69 causes a transient illness with debilitating symptoms (fever, headache, rash, myalgia,  
70 and arthralgia). Chronic infection is common and joint pain can persist for months to  
71 years (1-3). Half of the patients from the recent Latin American outbreak may develop  
72 chronic inflammatory rheumatism, raising the health burden of musculoskeletal disease  
73 in endemic areas (4, 5). During acute infection, CHIKV induces cytopathic effects and  
74 apoptosis leading to direct tissue injury and local inflammation (6-8). Biopsies have also  
75 revealed the persistence of CHIKV antigens and RNA in synovial macrophages and  
76 muscle tissue (1, 9). CHIKV also persists in mice and non-human primate models (10-  
77 13). Chronic disease may be a consequence of persistent, replicating and  
78 transcriptionally active CHIKV RNA (13), but an understanding of CHIKV's long-term  
79 effects is still emerging.

80 The ~12-kb positive-sense RNA genome of CHIKV encodes four non-structural  
81 proteins, nsP1 to nsP4, which make up the viral replication and transcription complex  
82 (reviewed in (14)). A subgenomic RNA expresses six structural proteins. Cellular  
83 responses to infection include apoptosis, interferon signalling, stress granule (SG)  
84 formation, unfolded protein response, host cell shut-off, and autophagy (reviewed in  
85 (15)). Previous research on alphaviruses established the vital role that nsP3 plays in  
86 counteracting cellular responses (16-20) and identified essential protein-protein  
87 interactions between nsP3 and host proteins (16, 21-23). However, few studies have  
88 systematically investigated the long-term effects of persistently replicating CHIKV RNA

## Persistence of NsP3 during Stable CHIKV Replication

---

89 and continued expression of proteins such as nsP3 on human cells. Although recent  
90 studies characterize the formation of organelles that contain nsP3 during acute infection  
91 and transient replication (16, 24-27), a corresponding characterization during persistent  
92 CHIKV replication is missing. To address these gaps, we sought to further develop  
93 CHIKV replicons capable of persistent replication in human cells and to harness this  
94 system for analysis by sub-diffraction multi-color microscopy.

95         We previously characterized transient viral replication in mammalian and  
96 invertebrate cell lines (27) and tagged nsP3 with the versatile SNAP-tag for advanced  
97 fluorescence microscopy applications (26). The development of a non-cytotoxic CHIKV  
98 replicon allowed the establishment of persistent replication in a human cell line (28).  
99 Here, we extended the SNAP-based labeling system to this non-cytotoxic CHIKV  
100 replicon and generated a human cell line that persistently replicates viral RNA and  
101 stably expresses SNAP-tagged nsP3. We then characterized nsP3-containing  
102 cytoplasmic granular organelles by sub-diffraction multi-color microscopy. The nsP3-  
103 containing granules overlapped with G3BP and were near double-stranded RNA  
104 (dsRNA) foci and nsP1-positive structures; moreover, they appeared associated with  
105 the cytoskeleton and cellular structures such as early endosomes and nucleopores.  
106 Granules persisted for hours and days, can accumulate newly synthesized protein, and  
107 move with different speeds through the cytoplasm. Granules did not dynamically  
108 exchange SNAP-nsP3 with their surroundings and were stable in cell lysates. Whereas  
109 cells with active replication and stable nsP3-granules did not respond to oxidative  
110 stress, cells that had cleared the non-cytotoxic replicon could form SGs. In summary,  
111 this study aims to contribute to a growing area of research on virus-host interactions

---

Persistence of NsP3 during Stable CHIKV Replication

---

112 during CHIKV infection by coupling a sub-diffraction microscopy analysis with an  
113 improved system to track nsP3 during persistent replication. This report is the first to  
114 shed light on the persistence of stable intracellular granules of nsP3 within human cells.  
115 In turn, understanding the link between the persistence of stable viral protein complexes  
116 and pathogenesis has relevance to future studies of chronic CHIKV disease.

117

118

119

120

121

122

123

124

125

126

127

128

129

## 130 Results

### 131 Development of a stable human-origin cell line carrying a SNAP-tagged CHIKV

### 132 replicon and super-resolution microscopy of nsP3-G3BP-granules. To determine

133 the intracellular distribution of nsP3, we previously generated a SNAP-tagged replicon

134 (26). Whereas this replicon is cytotoxic and replicates transiently, non-cytotoxic

135 replicons can establish persistent replication in the human cell line HuH-7 (28). To

136 improve the HuH-7 CHIKV cell line, we added a SNAP-tagged nsP3 to a non-cytotoxic

137 replicon and selected puromycin-resistant cells, which will be called “stable CHIKV

138 cells” throughout this paper. Silicon-rhodamine-conjugated O6-benzylguanine probes

139 (BG-647 SiR) labeled SNAP-nsP3 and revealed nsP3-granules (Fig. 1A) comparable to

140 those formed by CHIKV<sup>P3-SNAP</sup> and CHIKV<sup>P3-ZsGreen</sup>, viruses harbouring SNAP- or

141 ZsGreen-tagged nsP3 (Fig. 1B-C). Further experiments focused on the characterization

142 of these nsP3-granules. Whereas cells infected with CHIKV<sup>P3-ZsGreen</sup> only displayed a

143 granular nsP3-ZsGreen distribution pattern, cells infected with CHIKV<sup>P3-SNAP</sup> also made

144 rod-like structures (Fig. S2A) as was described previously (26, 27). However, the

145 presence of rods did not correlate with infectivity, as ZsGreen- and SNAP-tagged

146 viruses replicated to similar titres (Table S1).

147 CHIKV nsP3 sequesters G3BP1/2 in the context of either a replicon (16, 26) or

148 infectious virus (24, 25), thereby interfering with SG responses. Recent sub-diffraction

149 microscopy revealed stable substructures of G3BP1 protein within SGs (29, 30). To

150 determine whether nsP3-granules also sequestered G3BP proteins and contained

151 similar substructures, we imaged stable CHIKV cells with Airyscan microscopy.

---

Persistence of NsP3 during Stable CHIKV Replication

---

152 Airyscan or “Image Scanning Microscopy” (31, 32) relies on array detectors to reassign  
153 photon-pixels and oversample the pattern from diffracted light, thereby improving image  
154 resolution (by a factor of 1.7) and sensitivity (33). Airyscan outperformed standard  
155 confocal microscopy and was sensitive enough to detect small granular structures of  
156 nsP3 or G3BP2 (see Fig. S1 in the supplemental material). Whereas nsP3 and G3BP  
157 appeared to have a diffuse distribution in confocal images, the improved resolution of  
158 the Airyscan microscope uncovered an uneven distribution in a large (1.2  $\mu\text{m}$  diameter)  
159 granule, consistent with the presence of substructure (Fig. 2, ROI 1 and Fig. S1, ROI 4).  
160 In contrast, small granules (0.2-0.8  $\mu\text{m}$  diameter) lacked substructure (Fig. 2, ROI 2-6).  
161 Overall, nsP3 and G3BP2 staining overlapped inside granular structures (Fig. 2). Small  
162 clusters of nsP3 (0.2  $\mu\text{m}$  diameter) were ten times less intense than large granules. In  
163 summary, sub-diffraction microscopy revealed the co-occurrence of nsP3 and G3BP2 in  
164 granules that had a continuous size distribution but were associated with substructures  
165 only at larger diameters (i.e., 1.2  $\mu\text{m}$ ). Small granules (i.e. 0.2  $\mu\text{m}$ ) that had a ten-fold  
166 lower fluorescence intensity than larger granules (0.4-1.2  $\mu\text{m}$ ) were also visible as a  
167 result of the increased sensitivity of the Airyscan microscope.

168 **Juxtaposition of nsP3-granules, dsRNA foci, nsP1-positive structures,**  
169 **cytoskeleton, early endosomes, and nucleoporin.** During the viral life cycle nsP3-  
170 granules sequester G3BP, thereby blocking SG assembly (16, 17). The relationship  
171 between cytoplasmic nsP3-G3BP complexes and CHIKV RNA synthesis is less clear,  
172 as viral dsRNA foci show limited overlap with nsP3-G3BP clusters in cells transfected  
173 with a replicon (16) or with nsP1 in infected cells (25). However, more recently it was  
174 reported that large cytoplasmic and small plasma-membrane-bound G3BP-nsP3



## Persistence of nsP3 during Stable CHIKV Replication

---

175 complexes bind viral genomic RNA during CHIKV infection, with dsRNA-containing viral  
176 replication complexes forming nearby (24). The authors suggested that nsP3-G3BP  
177 granules play an extra role aside from merely sequestering SG-related proteins.

178 To further explore the relationship between nsP3 and replication sites in stable  
179 CHIKV cells, we used Airyscan microscopy to visualize SNAP-tag labeled nsP3,  
180 together with immunostaining for dsRNA and nsP1. Whereas the antibody against  
181 dsRNA can identify alphavirus replication complexes (34), the fluorescence of ZsGreen  
182 can serve as an indirect readout of the viral subgenomic RNA. Discrete dsRNA-foci  
183 were spread throughout the cytoplasm (Fig. S2B). Rather than completely overlapping  
184 with larger nsP3-granules, dsRNA foci were in a proximal location and often juxtaposed  
185 (Fig. 3). In another example, a dsRNA focus coincided with a smaller nsP3-containing  
186 cluster (Fig. 3, Cell 2, ROI 1). Ring-like structures coated with nsP1 were also near  
187 these dsRNA foci (Fig. 3). The proximity of dsRNA foci, nsP1-coated structures, and  
188 nsP3-granules suggested that the latter not only sequestered G3BP protein but also  
189 played a role in viral replication.

190 As described above, nsP3-containing granules were part of a unique  
191 microenvironment that also housed dsRNA foci and nsP1. To further characterize the  
192 environment surrounding granules in stable CHIKV cells, we probed for cytoskeletal  
193 proteins (vimentin,  $\beta$ -tubulin,  $\beta$ -actin). Stable CHIKV cells had intact networks of  
194 vimentin,  $\beta$ -actin, and  $\beta$ -tubulin (Fig. S3, Cells 4-6). Magnifications of nsP3-granules  
195 showed they were associated with the cytoskeleton (Fig. 4, arrowheads). Sometimes,  
196 patches of vimentin or  $\beta$ -tubulin appeared to partially enclose nsP3-granules (Fig.4, Cell  
197 4 ROI 1-3, Cell 5 ROI 1). Furthermore, a screen with antibody markers of cellular

## Persistence of NsP3 during Stable CHIKV Replication

---

198 compartments (ER, mitochondria, early endosomes, and the nuclear membrane)  
199 showed that nsP3-granules were often closely associated with Rab5 (early endosome  
200 marker), and Nup98 (nuclear pore protein) (Fig. 4). NsP3-granules were detected close  
201 to Rab5-positive organelles, but were not contained within them, as Rab5 and nsP3 did  
202 not overlap (Fig. 4, Cell 7). Granules were also located (i) at the nuclear membrane  
203 (Fig. 4, Cell 8 ROI 1 & 2), flanked by Nup98-containing regions; and (ii) near  
204 cytoplasmic clusters of Nup98 (Fig. 4, Cell 8 ROI 3-4). In summary, nsP3-containing  
205 granules of various sizes interacted with the cytoskeletal network, early endosomes and  
206 Nup98-containing structures.

### 207 **Imaging the dynamics of nsP3-containing granules within stable CHIKV cells.**

208 SNAP-reagents can label live cells, allowing both the analysis of movement of tagged  
209 proteins, as well as pulse-chase studies to examine protein turnover. Stable CHIKV  
210 cells labeled at the onset of a pulse-chase experiment still contained “aged” nsP3-  
211 granules after chase periods of 24 h and 48 h (Fig S4A). To track individual granules  
212 over time, we also imaged for shorter intervals (every 30 min). Large cytoplasmic nsP3-  
213 granules could be monitored over the length of the recording (2 h) and did not visibly  
214 disassemble (Fig. S4B). The addition of a non-fluorescent SNAP ligand (=quench) in  
215 complementary quench-pulse-chase experiments blocked all binding sites of the SNAP-  
216 tagged protein pool (Fig. S4C, FOV1). After a defined chase period of 1 hour in  
217 unlabeled media, pulsing with the fluorescent SNAP-reagent uncovered an unblocked  
218 population of nsP3-granules, consistent with newly synthesized protein accumulating in  
219 granular structures (Fig. S4C, FOV2). The staining of unblocked nsP3-granules  
220 increased with a 24-h chase (Fig S4C, FOV3).

## Persistence of nsP3 during Stable CHIKV Replication

---

221 To further study the intracellular transport of nsP3-granules, we imaged stable  
222 CHIKV cells at 8-s intervals with standard confocal microscopy. This revealed a mixture  
223 of nsP3-granules with (i) total displacements  $<5\ \mu\text{m}$  within perinuclear regions (Table  
224 S2, Movie S1 & Fig. 5A, open arrowheads); and (ii) total displacements  $>7\ \mu\text{m}$  (closed  
225 arrowheads). Next, we used instant structured illumination microscopy (iSIM) for live-  
226 cell recordings at higher frame rates (35). ISIM increases spatial resolution by a factor  
227 of  $\sqrt{2}$  compared with widefield microscopy, and by a further factor of  $\sqrt{2}$  with post-  
228 processing, while rapid image capture provides the temporal resolution needed for  
229 dynamic events within cells. Whereas small nsP3-granules moved through the  
230 cytoplasm over short distances with intermittent bursts of speed (Movie S2 & Fig. 5B,  
231 open arrowheads), large granules remained static during the recording and had a low  
232 net-displacement (Movie S2 & Fig 5B, closed arrowheads). In summary, the dynamic  
233 analysis of nsP3-granules showed that they (i) could persist in cells for days, (ii)  
234 accumulated newly synthesized protein and (iii) could be classified into static and motile  
235 subclasses with characteristic displacements and speeds.

236 **Static internal architecture of nsP3-granules during persistent replication.** To  
237 further investigate the dynamics of nsP3-granules we addressed the substructure of  
238 individual granules. As a reference, we expressed an EGFP-G3BP1 fusion in Huh-7  
239 cells, selected cells with a diffuse G3BP distribution, treated cells with sodium arsenite  
240 to induce SGs, and visualised G3BP-granules by fluorescence recovery after  
241 photobleaching (FRAP). EGFP fluorescence recovered within seconds after the  
242 photobleach (Fig. 6A, Fig. S5A), consistent with G3BPs rapidly shuttling into and out of  
243 SGs. To ask whether nsP3-granules exhibited the same dynamic property, we repeated

## Persistence of NsP3 during Stable CHIKV Replication

---

244 FRAP experiments in stable CHIKV cells labeled with BG-TMR-*Star*. No fluorescence  
245 recovery or redistribution occurred over the duration of the experiment (Fig. 6B, Fig.  
246 S5B), suggesting that nsP3 remained fixed within the granular architecture and did not  
247 undergo the dynamic exchange with the surrounding cytoplasm as seen for G3BP.

248       Previously, G3BP1-containing SGs were shown to be stable in lysates of  
249 stressed cells, suggesting that these membrane-less organelles are made up of stable  
250 core structures (29). To test whether this was also the case for nsP3-granules, we lysed  
251 stable CHIKV cells and examined the lysates by microscopy. Bright-field images of cell  
252 lysates indicated the presence of refractive granules, while fluorescence microscopy  
253 identified granules that had incorporated the BG-TMR-*Star* label (Fig. 7A). Next, we  
254 wanted to test whether nsP3 persistence led to an inability to respond to oxidative  
255 stress. Stable CHIKV cells maintained high levels of SNAP-nsP3 and ZsGreen for up to  
256 two months. In the absence of puromycin selection, however, cells with reduced or  
257 undetectable ZsGreen-fluorescence accumulated (discussed in Text S1). These cells  
258 were sensitive to puromycin (data not shown), suggesting that they no longer harbored  
259 the replicon. As expected, ZsGreen-positive cells sequestered G3BP2 into nsP3-  
260 containing granules, and new G3BP2-granules were absent after arsenite-induced  
261 stress (Fig. 7B, ROI 1). In contrast, cells lacking ZsGreen were able to form G3BP2-  
262 positive clusters after arsenite treatment (Fig. 7B, ROI 2). Therefore, the renewed ability  
263 to respond to arsenite-induced stress was associated with a loss of viral replication and  
264 nsP3-granules.

265

## 266 **Discussion**

267           The objectives of this study were firstly to characterize the interaction between  
268 CHIKV nsP3 and cellular components during persistent replication, and secondly to  
269 evaluate the persistence of cytoplasmic granules composed of viral and cellular  
270 proteins. To achieve these objectives, we expanded the utility of a non-cytotoxic  
271 replicon by combining it with SNAP-tag-based fluorescent labelling and sub-diffraction  
272 multi-color microscopy to provide unprecedented insights into the substructure of  
273 persistent nsP3-G3BP-granules. These studies revealed their relationship with dsRNA,  
274 nsP1-positive structures, and cellular organelles and examined their dynamics to  
275 uncover a stable population of nsP3-granules along with a subclass of nsP3-positive  
276 structures trafficking through the cell cytoplasm. Importantly we observed that nsP3-  
277 granules lacked a dynamic internal architecture and remained stable in cell lysates.  
278 Lastly, we showed that the ability to respond to oxidative stress was associated with the  
279 loss of CHIKV replication and nsP3-granules.

### 280 **Stable CHIKV cells as a versatile tool for studying cytoplasmic nsP3-granules.**

281 Previous reports on non-cytotoxic Old World alphaviruses elucidated the relationship  
282 between the loss of cytotoxicity and nsP2-specific mutations that lead to reductions in  
283 replication (28, 36-38). The cytopathic effects of a previously described SNAP-tagged  
284 replicon limited its study to transient experiments. We now overcome this limitation with  
285 a new HuH-7 cell line that harbors replicating CHIKV RNA and encodes both SNAP-  
286 tagged nsP3 and ZsGreen as a genetic reporter for viral subgenomic RNA. Whether this  
287 replicon only establishes persistent replication in specific cell types as has been

## Persistence of nsP3 during Stable CHIKV Replication

---

288 observed for other non-cytotoxic replicons (28, 36) remains to be determined. We found  
289 that the SNAP-tagged replicon also persisted in C2C12 mouse myoblasts, albeit less  
290 efficiently, whereas a glial cell line did not support continuous replication (R. Remenyi,  
291 unpublished data).

292 To our knowledge, the system presented here is the first to allow intracellular  
293 tracking of nsP3 during persistent replication of CHIKV RNA. A similar accumulation of  
294 nsP3 in cytoplasmic granules occurs in transient replicons (16, 26, 27) and during late  
295 stages of infection (24, 25, 27). Strikingly, SNAP-nsP3 in stable CHIKV cells did not  
296 form rod-like structures, which were observed in cells infected with CHIKV<sup>SNAP-P3</sup>. An  
297 overview of the literature on these rod-like structures and their appearance under  
298 different experimental conditions is presented in the supplemental material (Text S1).  
299 Surprisingly, infection with CHIKV<sup>P3-ZsGreen</sup> was not associated with the presence of rod-  
300 like structures. However, we cannot rule out that rod-like structures only form transiently  
301 and are no longer present at the observed time point.

302 Nonetheless, the lack of rods was not accompanied by a reduction in infectious  
303 titers. Thus, our results suggest that the ability to form rod-like structures can be  
304 affected by the sequence of the inserted tag in the C-terminal domain (SNAP vs.  
305 ZsGreen), but also whether nsP3 is expressed during persistent replication or infection.  
306 Interestingly, the non-cytotoxic replicon also encodes a leucine residue instead of  
307 isoleucine at position 175, in a presumed unstructured region between predicted  
308 domains of nsP3 (28). Although this mutation may primarily stabilize replication  
309 complexes in conjunction with other non-cytotoxic mutations (28), we do not know yet  
310 whether it affects the formation of rod-like structures. Taken together, SNAP-nsP3 can

## Persistence of nsP3 during Stable CHIKV Replication

---

311 form a mixture of cytoplasmic rod-like granular structures during CHIKV infection, but  
312 only granules persist in cells that persistently replicate CHIKV RNA.

313 **Persistence of nsP3-G3BP granules within a microenvironment containing**  
314 **dsRNA, nsP1, and cellular markers.** Sub-diffraction multi-color microscopy of stable  
315 cells revealed that nsP3-granules were (i) G3BP2-positive (ii) juxtaposed to dsRNA foci  
316 and nsP1-positive structures (iii) associated with cytoskeletal markers and (iv) proximal  
317 to Rab5- and Nup98-positive organelles. Alphavirus nsP3 forms cytoplasmic granules  
318 with vertebrate G3BP and the mosquito homolog Rasputin (16, 17, 21, 24, 25, 39-41).  
319 The non-cytotoxic replicon preserved this interaction in cytoplasmic granules whose  
320 diameter and protein-content varied. Moreover, only the larger granules (>1  $\mu\text{m}$ )  
321 appeared to have an internal substructure. In the future, stochastic optical  
322 reconstruction microscopy (STORM), which can provide an even higher resolution to  
323 Airyscan microscopy, may be necessary to reveal the detailed substructure of smaller  
324 granules (< 500 nm). For example, STORM revealed that G3BP-containing SGs had  
325 stable core structures of ~200-nm diameter (29).

326 Multi-color Airyscan microscopy provided a convenient workflow to examine  
327 ZsGreen-expressing stable cells for interactions between nsP3, dsRNA, and nsP1.  
328 Alphavirus nsP1 can bind membranes (42, 43) and may use its membrane-binding  
329 domain to tether replication complexes to cellular membranes (44). During infection of  
330 the related Semliki Forest Virus (SFV), nsP1 co-localizes with G3BPs in putative  
331 replication complexes (17). However, the nsP1:nsP3 and nsP1:G3BP association could  
332 not be clearly detected during transient CHIKV replication and CHIKV infection (16, 25,  
333 26). We were able to image a partial overlap of nsP1-positive structures with nsP3



## Persistence of nsP3 during Stable CHIKV Replication

---

334 granules in stable cells. Occasionally, nsP1 coated ring-like structures, which may  
335 represent virus-induced membranous organelles. Furthermore, we could detect dsRNA-  
336 positive foci in contact with nsP3-granules. Previous studies outlining the relationship  
337 between dsRNA and replication complexes during alphavirus infection are further  
338 discussed in the supplemental material (Text S1).

339         During the viral life cycle, SFV and Sindbis virus (SINV) form cytopathic  
340 vacuoles, which measure 0.6-2  $\mu\text{m}$  in diameter. Thus, nsP3-structures that are  
341 associated with dsRNA and ring-like structures of nsP1 in this study may be related to  
342 cytopathic vacuoles. Ultimately, correlative light and electron microscopy (CLEM) of  
343 stable CHIKV cells can elucidate the ultrastructure of nsP3-granules and their  
344 relationship with membranous organelles, as was done for Semliki Forest virus (SFV)  
345 (45). A useful feature of stable CHIKV cells is the fact that 100% of puromycin-selected  
346 cells have ongoing replication and that ZsGreen can serve as a reference for finding the  
347 same cell in CLEM approaches.

348         We also captured high-resolution images of an association between nsP3-  
349 granules and cytoskeletal markers. Previous microscopy analysis of vimentin and  
350 dsRNA during CHIKV infection implicates vimentin in an anchorage network that  
351 supports replication complexes (46). Vimentin also co-localizes with nsP3-containing  
352 complexes during SINV infection (22). Likewise, the cellular vimentin scaffold plays a  
353 role in directing Dengue virus replication complexes to perinuclear areas via an  
354 interaction with the viral NS4A protein (47). Thus, the observed concentration of nsP3-  
355 granules in perinuclear regions (Fig. 1, Fig. S1-2) could be explained by an  
356 nsP3:vimentin interaction, previously identified in proteomic studies (46). We note that a



## Persistence of NsP3 during Stable CHIKV Replication

---

357 further discussion of known interactions of alphaviruses with actin and tubulin networks,  
358 as well as Rab5-endosomes is provided in the supplemental material (Text S1). Our  
359 data provide evidence for similar interactions during persistent replication.

360 We also investigated the previously unexplored relationship between nsP3 and  
361 the nucleoporin Nup98. Little is known about the nuclear transport of nsP3, while the  
362 localization of nsP2 to the nucleus is well-documented (16, 40, 48, 49). Intriguingly, a  
363 role for G3BP as a nuclear transport factor has been proposed and SINV nsP3 has  
364 been identified at the nuclear membrane (21). Our results imply that nsP3-granules  
365 associate with a nucleoporin during persistent replication and may connect to RNA  
366 transport pathways at the nuclear membrane. Viral proteins that bind to Nups or RNA  
367 transport factors have been shown to stimulate remodeling of the nuclear membrane  
368 and affect nuclear transport of cellular mRNA and proteins (50, 51). During SFV  
369 infection, many nuclear proteins re-locate to the cytoplasm where they play both pro-  
370 viral and anti-viral roles (52). We also observed an association of nsP3-granules with  
371 cytoplasmic Nup98. During HCV infection, cytoplasmic nucleoporins accumulate at sites  
372 rich in viral proteins, including virus-induced membranous organelles and cytosolic lipid  
373 droplets (53, 54). In summary, Nups may play a role in persistent replication of CHIKV,  
374 which could hijack the physiological functions of nucleoporins to transport CHIKV  
375 nonstructural protein components, mRNA, viral RNA, or cellular proteins. Our data  
376 warrant a further investigation of this hypothesis.

377 **Stable CHIKV cells contain mixture of static and dynamic nsP3-granules, which**  
378 **lack dynamic internal architecture and are stable in cell lysates.** A key feature of  
379 the SNAP-tag is the experimental control over the time-of-labeling, enabling studies of

## Persistence of NsP3 during Stable CHIKV Replication

---

380 protein turnover. NsP3-granules were stable for hours and persisted for days. Granules  
381 were also the site where newly synthesized nsP3 accumulated. Thus, old and new  
382 populations of nsP3 may continuously mix within cytoplasmic granules, as was seen  
383 during transient replication (26). Live-cell microscopy also provided the first real-time  
384 tracking of CHIKV nsP3-granules and in-depth view of granule dynamics in mammalian  
385 cells. An overview of previous live-cell microscopy results, which identified subclasses  
386 of nsP3-structures based on movement patterns in SFV-infected cells (55), is provided  
387 in the supplemental material (Text S1). We report similar movement patterns, including  
388 (i) the presence of immobile granules within perinuclear regions and (ii) granules  
389 moving over short (1-2  $\mu\text{m}$ ) and long distances ( $>7 \mu\text{m}$ ) at maximum speeds between  
390 0.2 and 0.7  $\mu\text{m}/\text{s}$ . Because some of these patterns suggest actin-based transport, we  
391 are currently setting up additional live-cell microscopy experiments with live-cell probes  
392 for actin, but also microtubules or secretory vesicles. In the future, stable CHIKV cells  
393 can provide invaluable real-time insight into interactions between CHIKV and the host  
394 through multi-color imaging of ZsGreen, far-red-fluorescent SNAP-nsP3 labeling, and a  
395 third, blue- or red-fluorescent marker.

396 FRAP experiments revealed the static internal architecture of nsP3-granules,  
397 whereas arsenite-induced G3BP-granules had a similar fluorescence recovery as seen  
398 in human osteosarcoma cells (56). The absence of a rapid exchange in CHIKV-induced  
399 granules implies that nsP3 may play a role that differs biochemically from the dynamic  
400 role of G3BP in SGs (29, 30, 57). For example, nsP3 may create a scaffold similar to  
401 the one formed by Fas-activated serine/threonine kinase (FASTK) in SGs (57). Although  
402 we cannot rule out that G3BP shuttles in and out of nsP3-granules, we predict that

## Persistence of NsP3 during Stable CHIKV Replication

---

403 G3BP would be fixed in granules in a similar way: nsP3 completely overlapped with  
404 G3BP and nsP3-granules were stable enough to be preserved in cell lysates. Moreover,  
405 previous studies demonstrated that alphavirus nsP3-G3BP granules lack canonical SG  
406 markers (16, 17) and remain stable during cycloheximide treatment (16), which  
407 dissolves SGs (58). FRAP experiments of membrane-associated foci containing non-  
408 structural proteins of another RNA virus, HCV, also found a limited exchange between  
409 clusters of non-structural proteins and the periphery (59-61). Thus, some of the nsP3-  
410 structures may represent cytopathic vacuoles, in which nsP3 has a limited exchange  
411 with the surrounding cytoplasm.

412 Unlike cytopathic vacuoles, which would be sensitive to detergents, a population  
413 of nsP3-granules was detergent-resistant and stable in cell lysates. This persistence in  
414 lysates mimics that of mammalian SG cores (29). Jain et al. describe a dynamic shell  
415 around core structures that gives SGs biochemical qualities akin to liquid-liquid phase  
416 separations. We propose that similar stable core structures could make up nsP3-G3BP  
417 granules. Text S1 provides a brief overview of the link between liquid-liquid phase  
418 separation, membrane-less organelles, stress responses, and toxic protein clusters,  
419 which are a hallmark of neurodegenerative disease. This link forms the basis of a new  
420 hypothesis that nsP3-granules can perturb cellular responses to environmental  
421 conditions. However, more experiments are needed to (i) further characterize persistent  
422 nsP3-granules biochemically (ii) identify other cellular or viral proteins within granules;  
423 and (iii) induce granular disassembly. Clearing cells of these stable cytoplasmic  
424 complexes could be essential for preventing toxic effects that only emerge during  
425 prolonged exposure to CHIKV proteins. Moreover, directly targeting persistent nsP3-

## Persistence of NsP3 during Stable CHIKV Replication

---

426 granules could lead to new approaches to combat Chikungunya virus infections.

427 Encouragingly, cells that cleared the CHIKV replicon during culturing in the absence of  
428 selective pressure were able to regain the ability to form SGs in response to arsenite  
429 treatment.

430 In summary, our results present the first evidence that granules containing the  
431 viral protein nsP3 and cellular protein G3BP persist in human cells with autonomously  
432 replicating CHIKV RNA. Generation of a cell line harboring a persistently replicating  
433 SNAP-tagged replicon and advances in microscopy technology allowed us to reveal  
434 interactions between SNAP-nsP3, viral components (nsP1, dsRNA), and cellular  
435 components (cytoskeleton, endosomes, nucleoporin). Overall, nsP3-granules were  
436 stable, differed in their mobility, lacked a dynamic internal architecture, and were stable  
437 in cell lysates. These findings may also have clinical relevance, as CHIKV can cause  
438 chronic infection and persist in various cell types, such as macrophages, muscle, and  
439 liver cells. However, whether prolonged exposure to nsP3-granules causes pathogenic  
440 changes within the cell and can contribute to the long-term effects of Chikungunya  
441 disease remains to be determined in future studies. Lastly, the reagent presented in this  
442 study adds a new dimension for future explorations of host-pathogen interactions, in  
443 particular as they relate to nsP3, and for the search for inhibitors that specifically target  
444 nsP3.

445

446

447

448

## 449 **Materials and Methods**

450 **CHIKV constructs.** The replicon CHIKVRepRLuc-FL-5A-PG-IL was described  
451 previously and allows for stable, non-cytotoxic growth in HuH-7 cells (28). It contained a  
452 cassette encoding a puromycin-N-acetyltransferase (Pac) - FMDV 2A autoprotease -  
453 ZsGreen fusion under the control of the sg-promoter. Further information on the  
454 construction of a SNAP-tagged derivative of this non-cytotoxic replicon and infectious  
455 clones CHIKV<sup>SNAP-nsP3</sup> and CHIKV<sup>ZsGreen-nsP3</sup> is provided in the supplemental material  
456 (Text S2).

457 **Cells, media, transfection, and infection.** HuH-7 cells were maintained in complete  
458 media (Dulbecco's modified Eagle's medium supplemented with fetal calf serum,  
459 penicillin, streptomycin, non-essential amino acids and HEPES Buffer) as described  
460 previously (26). HuH-7 is a well differentiated hepatocyte-derived cellular carcinoma cell  
461 line taken from the liver tumor of a male Japanese patient in 1982 (62); these cells were  
462 from John McLauchlan (Centre for Virus Research, Glasgow). Growth media  
463 supplemented with puromycin (final concentration, 5 µg/ml) was used for antibiotic  
464 selection.

465 Additional information on electroporating HuH-7 cells with in vitro transcribed  
466 RNA of the SNAP-tagged non-cytotoxic replicon can be found in the supplemental  
467 material (Text S2). Electroporated cells were seeded in 10-cm dishes. Cells were  
468 incubated in puromycin-free media for a minimum of two days before starting puromycin  
469 selection. During puromycin selection, cells were monitored with a widefield  
470 fluorescence microscope and a FITC filter setup for ZsGreen fluorescence. After

## Persistence of NsP3 during Stable CHIKV Replication

---

471 ZsGreen-positive cells reached a high proportion (2-5 days), cells were expanded in  
472 puromycin-free media. Heterogeneous populations of ZsGreen-positive cells, which we  
473 call “stable CHIKV cells”, were collected from confluent T75 flasks to make frozen cell  
474 stocks in fetal calf serum supplemented with 10% DMSO (about two weeks after  
475 electroporation). At the same time, stable CHIKV cells were passaged under routine  
476 conditions and used in microscopy experiments.

477 **Indirect immunofluorescence assay, intracellular SNAP-tag labeling, and pulse-**  
478 **chase experiments.** Primary and secondary antibodies used in indirect  
479 immunofluorescence assays (IFA) are listed in Text S2.

480 For intracellular SNAP-tag labeling, stable CHIKV cells were plated in 24-well  
481 plates containing 13-mm glass coverslips. The next day, SNAP-nsP3 was fluorescently  
482 labeled in live cells as described previously (26, 63) and outlined in Text S2. Note that  
483 for staining of SNAP-nsP3 from a viral infection (Fig. 1), infected cells were first fixed at  
484 room temperature with 4% formaldehyde for 30 min to inactivate infectious virus,  
485 followed by the same SNAP-staining protocol outlined below, since chemical fixation did  
486 not abolish the ability of SNAP ligands to bind to the SNAP sequence.

487 For IFA and staining with G3BP2,  $\beta$ -actin, or J2 antibodies, formaldehyde-fixed  
488 cells were permeabilized with 100% Methanol for 10 min at -20°C. For all other  
489 antibodies, cells were permeabilized with a buffer containing 5% fetal calf serum and  
490 0.3% Triton X 100. Cells were incubated with primary antibody solution containing 1%  
491 bovine serum albumin (BSA) overnight at 4°C, except the mouse J2 antibody, which  
492 was incubated for 2 h at room temperature in diethylpyrocarbonate-treated PBS. After

---

Persistence of NsP3 during Stable CHIKV Replication

---

493 three washes in PBS, secondary antibody (anti-rabbit Alexa Fluor 594-conjugated IgG  
494 or anti-mouse Alexa Fluor 594-conjugated IgG, Molecular Probes) was added. For  
495 nsP3/J2/nsP1 triple staining, rabbit nsP1 antibody was added overnight at 4°C to cells  
496 already stained with BG-647 SiR (benzylguanaine-silicon-rhodamine) and mouse J2. The  
497 following day, cells were washed three times in PBS and secondary antibody (anti-  
498 rabbit Alexa Fluor DyLight 405) was added. These cells were not counterstained with  
499 4',6-diamidino-2-phenylindole (DAPI). However, where indicated (Fig. 1, 2, 4), DAPI was  
500 added to visualize nuclei. Coverslips were mounted onto glass slides by addition of  
501 ProLong Diamond Antifade Mountant (Molecular Probes).

502       Protocols for pulse-chase experiments and analyses of protein turnover with  
503 fluorescence microscopy are available in the supplemental material (Text S2).

504 **Sub-diffraction light microscopy.** An LSM880 upright confocal microscope with  
505 Airyscan (ZEISS) was used to acquire sub-diffraction microscopy images as described  
506 previously (26, 63). This microscope provides a maximum lateral resolution of 140 nm  
507 and axial resolution of 400 nm for a fluorophore emitting at 480 nm. Microscope settings  
508 during the acquisition of a series of axial images (Z-stack) are provided in the  
509 supplemental material (Text S2). To increase signal-to-noise ratio and resolution, image  
510 stacks were processed by Airyscan batch processing within Zen Black. Single-slice  
511 images were extracted to produce panels in Fig. 2, 3 and 4. Cell overviews are provided  
512 as maximum-intensity projections in Fig. S2 and 3. Note that although live-cell Airyscan  
513 microscopy is technically possible, we only used Airyscan microscopy for fixed cells,  
514 since our microscope was not set up for live-cell imaging.



## Persistence of NsP3 during Stable CHIKV Replication

---

515 **Live-cell microscopy of stable CHIKV cells.** Live-cell imaging was done on an  
516 LSM700 AxioObserver inverted confocal microscope (ZEISS) equipped with Plan-  
517 Apochromat 63x/1.4 Oil Ph3 M27 objective and an incubator box and heated stage set  
518 to 37°C. Cells were grown in 35 mm glass (No. 1.5) bottom dishes with 27 mm viewing  
519 area (Nunc). Stable CHIKV cells were stained with BG-SiR and Mitotracker Red FM  
520 (Molecular Probes), then maintained at 37°C in an optically clear, physiological, and  
521 CO<sub>2</sub>-independent imaging buffer (Molecular Probes, Live Cell Imaging Solution  
522 supplemented with 10% fetal calf serum, non-essential amino acids and buffered with  
523 10 mM HEPES). To suppress photobleaching, ProLong Live Antifade Reagent was  
524 added according to manufacturer's instructions (Molecular Probes). The setup of  
525 microscope settings is noted in the supplemental material (Text S2).

526 A home-built instant structured illumination microscope (iSIM) was used to  
527 acquire additional time-lapse series (Fig. 5B). This instrument is fitted with an Olympus  
528 Water Immersion Objective 1.2 NA UPLSAPO 60XW, and 488 nm and 561 nm lasers  
529 (64). Stable CHIKV cells were stained with red-fluorescent BG-TMR-*Star* before image  
530 acquisition. The heated stage was set to 37°C. The same live cell imaging media  
531 described above was used, supplemented with ProLong Live AntiFade reagent.  
532 Regions of interest were found using the live iSIM display in the green channel  
533 (ZsGreen) to avoid bleaching of the red channel (nsP3). Time-lapse series were  
534 acquired by taking images of the red and green channels at intervals of 1080 msec.  
535 Note that green and red channels are shown in Movie S2, whereas Fig. 5B only shows  
536 the nsP3-channel to emphasize the movement of nsP3-granules (red channel).



---

Persistence of NsP3 during Stable CHIKV Replication

---

537 **FRAP analysis.** To induce genuine stress granules in HuH-7 cells, the plasmid pEGFP-  
538 G3BP (kindly provided by Richard Lloyd, Baylor), encoding a EGFP-G3BP1 fusion  
539 protein (65), was transfected with Lipofectamine 2000 reagent (Thermo Fischer  
540 Scientific) into cells plated in a 35 mm glass (No. 1.5) bottom dishes with 27 mm  
541 viewing area (Nunc). After 24 hours, cells containing G3BP granules were identified by  
542 live-cell microscopy on a LSM700 confocal system set to 37°C. Stable CHIKV cells,  
543 stained with BG-TMR-*Star* with the live-cell protocol, were used for experiments imaging  
544 SNAP-nsP3. Experimental details for fluorescence recovery after photobleaching  
545 (FRAP) experiments are provided in the supplemental material (Text S2).

546 **Isolation of SNAP-nsP3 from cell lysates.** Stable CHIKV cells grown in 6-well plates  
547 were labeled with BG-TMR-*Star* according to the live-cell staining protocol outlined  
548 above. Cells were collected by scraping into PBS using plastic cell scrapers, followed by  
549 centrifugation in 1.5-ml microcentrifuge tubes. Cell pellets were lysed with 300 µl ice-  
550 cold Glasgow Lysis Buffer [1% Triton X-100, 120 mM KCl, 30 mM NaCl, 5 mM MgCl<sub>2</sub>,  
551 10% glycerol, and 10 mM piperazine-*N,N*-bis(2-ethanesulfonic acid) (PIPES)-NaOH, pH  
552 7.2] containing protease inhibitors. Lysates were vortexed for 30 s for four cycles and  
553 returned to ice in between cycles. A final spin at 850 g was included to remove  
554 remaining cellular debris. The final supernatant was added to a 2-well Ibidi plastic slide  
555 with Ibitreat surface for optimal cell adhesion (Ibidi). After an overnight incubation at  
556 4°C, 1 ml of 4% Formaldehyde was added to each well for 1 h at room temperature.  
557 Wells were washed with PBS and images with an LSM880 system operated in confocal  
558 mode.

---

Persistence of NsP3 during Stable CHIKV Replication

---

559 **Bioimage analysis.** Microscopy images were processed on the Icy  
560 (<http://icy.bioimageanalysis.org>) platform (66). Contrast was optimized in individual  
561 images by dragging the adjustable bounds of the histogram viewer, which enhances the  
562 contrast in each channel without altering the data (66). Color maps (Cyan, Magenta,  
563 Green, Gray, Yellow, Fire or Jet) were applied with the lookup table manager to each  
564 channel in combination with the corresponding histogram bounds. Further analyses with  
565 the Icy software, including segmentation and tracking of granules are described in Text  
566 S2.

567

568

569

570

571

572

573

574

575

## 576 **Funding Information**

577           This work was funded by a Wellcome Trust Investigator Award to MH (WT  
578 096670). Purchase of shared equipment was made possible by a Wellcome Trust Multi-  
579 user equipment award (Zeiss LSM880 instrument, WT104918MA, “Multifunctional  
580 imaging of living cells for biomedical sciences”) and a Royal Society equipment grant to  
581 Dr. Jamel Mankouri (Zeiss LSM700 instrument, grant number RG110306). Work to build  
582 the iSIM system was supported by MRC grant ref MR/K015613/1. YG was supported by  
583 a China Scholarship Council/University of Leeds PhD studentship.

## 584 **Acknowledgements**

585 We thank Dr. Sally Boxall and the Bio-imaging Facility within the Faculty of Biological  
586 Sciences of the University of Leeds for access and help with Airyscan microscopes and  
587 Dr. Jamel Mankouri for access and help with the LSM700 confocal system. We also  
588 thank Grace C. Roberts and Raymond Li for assistance in culturing of the HuH-7 cell  
589 line and stable CHIKV cells.

## 590 **Other information**

591 Competing financial interests: The authors have declared that no competing interests  
592 exist.

593

594

595

596

## 597 **References**

- 598 1. **Hoarau JJ, Jaffar Bandjee MC, Krejbich Trotot P, Das T, Li-Pat-Yuen G,**  
599 **Dassa B, Denizot M, Guichard E, Ribera A, Henni T, Tallet F, Moiton MP,**  
600 **Gauzere BA, Bruniquet S, Jaffar Bandjee Z, Morbidelli P, Martigny G, Jolivet**  
601 **M, Gay F, Grandadam M, Tolou H, Vieillard V, Debre P, Autran B, Gasque P.**  
602 2010. Persistent chronic inflammation and infection by Chikungunya arthritogenic  
603 alphavirus in spite of a robust host immune response. *J Immunol* **184**:5914-5927.
- 604 2. **Schilte C, Staikowsky F, Couderc T, Madec Y, Carpentier F, Kassab S,**  
605 **Albert ML, Lecuit M, Michault A.** 2013. Chikungunya virus-associated long-  
606 term arthralgia: a 36-month prospective longitudinal study. *PLoS Negl Trop Dis*  
607 **7**:e2137.
- 608 3. **Javelle E, Ribera A, Degasne I, Gauzere BA, Marimoutou C, Simon F.** 2015.  
609 Specific management of post-chikungunya rheumatic disorders: a retrospective  
610 study of 159 cases in Reunion Island from 2006-2012. *PLoS Negl Trop Dis*  
611 **9**:e0003603.
- 612 4. **Rodriguez-Morales AJ, Cardona-Ospina JA, Villamil-Gomez W, Paniz-**  
613 **Mondolfi AE.** 2015. How many patients with post-chikungunya chronic  
614 inflammatory rheumatism can we expect in the new endemic areas of Latin  
615 America? *Rheumatol Int* **35**:2091-2094.
- 616 5. **Rodriguez-Morales AJ, Gil-Restrepo AF, Ramirez-Jaramillo V, Montoya-**  
617 **Arias CP, Acevedo-Mendoza WF, Bedoya-Arias JE, Chica-Quintero LA,**  
618 **Murillo-Garcia DR, Garcia-Robledo JE, Castrillon-Spitia JD, Londono JJ,**

Persistence of NsP3 during Stable CHIKV Replication

---

- 619 **Bedoya-Rendon HD, Cardenas-Perez Jde J, Cardona-Ospina JA, Lagos-**  
620 **Grisales GJ.** 2016. Post-chikungunya chronic inflammatory rheumatism: results  
621 from a retrospective follow-up study of 283 adult and child cases in La Virginia,  
622 Risaralda, Colombia. *F1000Res* **5**:360.
- 623 6. **Sourisseau M, Schilte C, Casartelli N, Trouillet C, Guivel-Benhassine F,**  
624 **Rudnicka D, Sol-Foulon N, Le Roux K, Prevost MC, Fsihi H, Frenkiel MP,**  
625 **Blanchet F, Afonso PV, Ceccaldi PE, Ozden S, Gessain A, Schuffenecker I,**  
626 **Verhasselt B, Zamborlini A, Saib A, Rey FA, Arenzana-Seisdedos F,**  
627 **Despres P, Michault A, Albert ML, Schwartz O.** 2007. Characterization of  
628 reemerging chikungunya virus. *PLoS Pathog* **3**:e89.
- 629 7. **Krejlich-Trotot P, Denizot M, Hoarau JJ, Jaffar-Bandjee MC, Das T, Gasque**  
630 **P.** 2011. Chikungunya virus mobilizes the apoptotic machinery to invade host cell  
631 defenses. *Faseb j* **25**:314-325.
- 632 8. **Dhanwani R, Khan M, Alam SI, Rao PV, Parida M.** 2011. Differential proteome  
633 analysis of Chikungunya virus-infected new-born mice tissues reveal implication  
634 of stress, inflammatory and apoptotic pathways in disease pathogenesis.  
635 *Proteomics* **11**:1936-1951.
- 636 9. **Ozden S, Huerre M, Riviere JP, Coffey LL, Afonso PV, Mouly V, de**  
637 **Monredon J, Roger JC, El Amrani M, Yvin JL, Jaffar MC, Frenkiel MP,**  
638 **Sourisseau M, Schwartz O, Butler-Browne G, Despres P, Gessain A,**  
639 **Ceccaldi PE.** 2007. Human muscle satellite cells as targets of Chikungunya virus  
640 infection. *PLoS One* **2**:e527.

Persistence of NsP3 during Stable CHIKV Replication

---

- 641 10. **Hawman DW, Stoermer KA, Montgomery SA, Pal P, Oko L, Diamond MS,**  
642 **Morrison TE.** 2013. Chronic joint disease caused by persistent Chikungunya  
643 virus infection is controlled by the adaptive immune response. *J Virol* **87**:13878-  
644 13888.
- 645 11. **Labadie K, Larcher T, Joubert C, Mannioui A, Delache B, Brochard P,**  
646 **Guigand L, Dubreil L, Lebon P, Verrier B, de Lamballerie X, Suhrbier A,**  
647 **Cherel Y, Le Grand R, Roques P.** 2010. Chikungunya disease in nonhuman  
648 primates involves long-term viral persistence in macrophages. *J Clin Invest*  
649 **120**:894-906.
- 650 12. **Messaoudi I, Vomaske J, Totonchy T, Kreklywich CN, Haberthur K,**  
651 **Springgay L, Brien JD, Diamond MS, Defilippis VR, Streblow DN.** 2013.  
652 Chikungunya virus infection results in higher and persistent viral replication in  
653 aged rhesus macaques due to defects in anti-viral immunity. *PLoS Negl Trop Dis*  
654 **7**:e2343.
- 655 13. **Poo YS, Rudd PA, Gardner J, Wilson JA, Larcher T, Colle MA, Le TT,**  
656 **Nakaya HI, Warrilow D, Allcock R, Bielefeldt-Ohmann H, Schroder WA,**  
657 **Khromykh AA, Lopez JA, Suhrbier A.** 2014. Multiple immune factors are  
658 involved in controlling acute and chronic chikungunya virus infection. *PLoS Negl*  
659 *Trop Dis* **8**:e3354.
- 660 14. **Strauss JH, Strauss EG.** 1994. The alphaviruses: gene expression, replication,  
661 and evolution. *Microbiol Rev* **58**:491-562.

Persistence of NsP3 during Stable CHIKV Replication

---

- 662 15. **Fros JJ, Pijlman GP.** 2016. Alphavirus Infection: Host Cell Shut-Off and  
663 Inhibition of Antiviral Responses. *Viruses* **8**.
- 664 16. **Fros JJ, Domeradzka NE, Baggen J, Geertsema C, Flipse J, Vlak JM,**  
665 **Pijlman GP.** 2012. Chikungunya virus nsP3 blocks stress granule assembly by  
666 recruitment of G3BP into cytoplasmic foci. *J Virol* **86**:10873-10879.
- 667 17. **Panas MD, Varjak M, Lulla A, Eng KE, Merits A, Karlsson Hedestam GB,**  
668 **McInerney GM.** 2012. Sequestration of G3BP coupled with efficient translation  
669 inhibits stress granules in Semliki Forest virus infection. *Mol Biol Cell* **23**:4701-  
670 4712.
- 671 18. **Ecke L, Krieg S, Butepage M, Lehmann A, Gross A, Lippok B, Grimm AR,**  
672 **Kummerer BM, Rossetti G, Luscher B, Verheugd P.** 2017. The conserved  
673 macrodomains of the non-structural proteins of Chikungunya virus and other  
674 pathogenic positive strand RNA viruses function as mono-ADP-  
675 ribosylhydrolases. *Sci Rep* **7**:41746.
- 676 19. **McPherson RL, Abraham R, Sreekumar E, Ong SE, Cheng SJ, Baxter VK,**  
677 **Kistemaker HA, Filippov DV, Griffin DE, Leung AK.** 2017. ADP-  
678 ribosylhydrolase activity of Chikungunya virus macrodomain is critical for virus  
679 replication and virulence. *Proc Natl Acad Sci U S A* **114**:1666-1671.
- 680 20. **Mathur K, Anand A, Dubey SK, Sanan-Mishra N, Bhatnagar RK, Sunil S.**  
681 2016. Analysis of chikungunya virus proteins reveals that non-structural proteins  
682 nsP2 and nsP3 exhibit RNA interference (RNAi) suppressor activity. *Sci Rep*  
683 **6**:38065.

Persistence of NsP3 during Stable CHIKV Replication

---

- 684 21. **Cristea IM, Carroll JW, Rout MP, Rice CM, Chait BT, MacDonald MR.** 2006.  
685 Tracking and elucidating alphavirus-host protein interactions. *J Biol Chem*  
686 **281**:30269-30278.
- 687 22. **Frolova E, Gorchakov R, Garmashova N, Atasheva S, Vergara LA, Frolov I.**  
688 2006. Formation of nsP3-specific protein complexes during Sindbis virus  
689 replication. *J Virol* **80**:4122-4134.
- 690 23. **Neuvonen M, Kazlauskas A, Martikainen M, Hinkkanen A, Ahola T, Saksela**  
691 **K.** 2011. SH3 domain-mediated recruitment of host cell amphiphysins by  
692 alphavirus nsP3 promotes viral RNA replication. *PLoS Pathog* **7**:e1002383.
- 693 24. **Kim DY, Reynaud JM, Rasalousskaya A, Akhrymuk I, Mobley JA, Frolov I,**  
694 **Frolova EI.** 2016. New World and Old World Alphaviruses Have Evolved to  
695 Exploit Different Components of Stress Granules, FXR and G3BP Proteins, for  
696 Assembly of Viral Replication Complexes. *PLoS Pathog* **12**:e1005810.
- 697 25. **Scholte FE, Tas A, Albuлесcu IC, Zusinaite E, Merits A, Snijder EJ, van**  
698 **Hemert MJ.** 2015. Stress granule components G3BP1 and G3BP2 play a  
699 proviral role early in Chikungunya virus replication. *J Virol* **89**:4457-4469.
- 700 26. **Remenyi R, Roberts GC, Zothner C, Merits A, Harris M.** 2017. SNAP-tagged  
701 Chikungunya Virus Replicons Improve Visualisation of Non-Structural Protein 3  
702 by Fluorescence Microscopy. *Sci Rep* **7**:5682.
- 703 27. **Roberts GC, Zothner C, Remenyi R, Merits A, Stonehouse NJ, Harris M.**  
704 2017. Evaluation of a range of mammalian and mosquito cell lines for use in  
705 Chikungunya virus research. *Sci Rep* **7**:14641.



---

Persistence of NsP3 during Stable CHIKV Replication

---

- 706 28. **Utt A, Das PK, Varjak M, Lulla V, Lulla A, Merits A.** 2015. Mutations conferring  
707 a noncytotoxic phenotype on chikungunya virus replicons compromise enzymatic  
708 properties of nonstructural protein 2. *J Virol* **89**:3145-3162.
- 709 29. **Jain S, Wheeler JR, Walters RW, Agrawal A, Barsic A, Parker R.** 2016.  
710 ATPase-Modulated Stress Granules Contain a Diverse Proteome and  
711 Substructure. *Cell* **164**:487-498.
- 712 30. **Wheeler JR, Matheny T, Jain S, Abrisch R, Parker R.** 2016. Distinct stages in  
713 stress granule assembly and disassembly. *Elife* **5**.
- 714 31. **Muller CB, Enderlein J.** 2010. Image scanning microscopy. *Phys Rev Lett*  
715 **104**:198101.
- 716 32. **Sheppard CJ, Mehta SB, Heintzmann R.** 2013. Superresolution by image  
717 scanning microscopy using pixel reassignment. *Opt Lett* **38**:2889-2892.
- 718 33. **Huff J.** 2015. The Airyscan detector from ZEISS: confocal imaging with improved  
719 signal-to-noise ratio and super-resolution. *Nat Meth* **12**.
- 720 34. **Frolova EI, Gorchakov R, Pereboeva L, Atasheva S, Frolov I.** 2010.  
721 Functional Sindbis virus replicative complexes are formed at the plasma  
722 membrane. *J Virol* **84**:11679-11695.
- 723 35. **York AG, Chandris P, Nogare DD, Head J, Wawrzusin P, Fischer RS, Chitnis**  
724 **A, Shroff H.** 2013. Instant super-resolution imaging in live cells and embryos via  
725 analog image processing. *Nat Methods* **10**:1122-1126.

---

Persistence of NsP3 during Stable CHIKV Replication

---

- 726 36. **Agapov EV, Frolov I, Lindenbach BD, Pragai BM, Schlesinger S, Rice CM.**  
727 1998. Noncytopathic Sindbis virus RNA vectors for heterologous gene  
728 expression. *Proc Natl Acad Sci U S A* **95**:12989-12994.
- 729 37. **Casales E, Rodriguez-Madoz JR, Ruiz-Guillen M, Razquin N, Cuevas Y,**  
730 **Prieto J, Smerdou C.** 2008. Development of a new noncytopathic Semliki Forest  
731 virus vector providing high expression levels and stability. *Virology* **376**:242-251.
- 732 38. **Pohjala L, Utt A, Varjak M, Lulla A, Merits A, Ahola T, Tammela P.** 2011.  
733 Inhibitors of alphavirus entry and replication identified with a stable Chikungunya  
734 replicon cell line and virus-based assays. *PLoS One* **6**:e28923.
- 735 39. **Frolov I, Kim DY, Akhrymuk M, Mobley JA, Frolova EI.** 2017. Hypervariable  
736 Domain of Eastern Equine Encephalitis Virus nsP3 Redundantly Utilizes Multiple  
737 Cellular Proteins for Replication Complex Assembly. *J Virol* **91**.
- 738 40. **Fros JJ, Geertsema C, Zouache K, Baggen J, Domeradzka N, van Leeuwen**  
739 **DM, Flipse J, Vlak JM, Failloux AB, Pijlman GP.** 2015. Mosquito Rasputin  
740 interacts with chikungunya virus nsP3 and determines the infection rate in *Aedes*  
741 *albopictus*. *Parasit Vectors* **8**:464.
- 742 41. **Gorchakov R, Garmashova N, Frolova E, Frolov I.** 2008. Different types of  
743 nsP3-containing protein complexes in Sindbis virus-infected cells. *J Virol*  
744 **82**:10088-10101.
- 745 42. **Peranen J, Laakkonen P, Hyvonen M, Kaariainen L.** 1995. The alphavirus  
746 replicase protein nsP1 is membrane-associated and has affinity to endocytic  
747 organelles. *Virology* **208**:610-620.

---

Persistence of NsP3 during Stable CHIKV Replication

---

- 748 43. **Salonen A, Vasiljeva L, Merits A, Magden J, Jokitalo E, Kaariainen L.** 2003.  
749 Properly folded nonstructural polyprotein directs the semliki forest virus  
750 replication complex to the endosomal compartment. *J Virol* **77**:1691-1702.
- 751 44. **Ahola T, Lampio A, Auvinen P, Kaariainen L.** 1999. Semliki Forest virus  
752 mRNA capping enzyme requires association with anionic membrane  
753 phospholipids for activity. *EMBO J* **18**:3164-3172.
- 754 45. **Hellstrom K, Vihinen H, Kallio K, Jokitalo E, Ahola T.** 2015. Correlative light  
755 and electron microscopy enables viral replication studies at the ultrastructural  
756 level. *Methods* **90**:49-56.
- 757 46. **Issac TH, Tan EL, Chu JJ.** 2014. Proteomic profiling of chikungunya virus-  
758 infected human muscle cells: reveal the role of cytoskeleton network in CHIKV  
759 replication. *J Proteomics* **108**:445-464.
- 760 47. **Teo CS, Chu JJ.** 2014. Cellular vimentin regulates construction of dengue virus  
761 replication complexes through interaction with NS4A protein. *J Virol* **88**:1897-  
762 1913.
- 763 48. **Fros JJ, Liu WJ, Prow NA, Geertsema C, Ligtenberg M, Vanlandingham DL,**  
764 **Schnettler E, Vlak JM, Suhrbier A, Khromykh AA, Pijlman GP.** 2010.  
765 Chikungunya virus nonstructural protein 2 inhibits type I/II interferon-stimulated  
766 JAK-STAT signaling. *J Virol* **84**:10877-10887.
- 767 49. **Akhrymuk I, Kulemzin SV, Frolova EI.** 2012. Evasion of the innate immune  
768 response: the Old World alphavirus nsP2 protein induces rapid degradation of  
769 Rpb1, a catalytic subunit of RNA polymerase II. *J Virol* **86**:7180-7191.

Persistence of NsP3 during Stable CHIKV Replication

---

- 770 50. **Chang CW, Lee CP, Su MT, Tsai CH, Chen MR.** 2015. BGLF4 kinase  
771 modulates the structure and transport preference of the nuclear pore complex to  
772 facilitate nuclear import of Epstein-Barr virus lytic proteins. *J Virol* **89**:1703-1718.
- 773 51. **Gong D, Kim YH, Xiao Y, Du Y, Xie Y, Lee KK, Feng J, Farhat N, Zhao D, Shu**  
774 **S, Dai X, Chanda SK, Rana TM, Krogan NJ, Sun R, Wu TT.** 2016. A  
775 Herpesvirus Protein Selectively Inhibits Cellular mRNA Nuclear Export. *Cell Host*  
776 *Microbe* **20**:642-653.
- 777 52. **Varjak M, Saul S, Arike L, Lulla A, Peil L, Merits A.** 2013. Magnetic  
778 fractionation and proteomic dissection of cellular organelles occupied by the late  
779 replication complexes of Semliki Forest virus. *J Virol* **87**:10295-10312.
- 780 53. **Lussignol M, Kopp M, Molloy K, Vizcay-Barrena G, Fleck RA, Dorner M, Bell**  
781 **KL, Chait BT, Rice CM, Catanese MT.** 2016. Proteomics of HCV virions reveals  
782 an essential role for the nucleoporin Nup98 in virus morphogenesis. *Proc Natl*  
783 *Acad Sci U S A* **113**:2484-2489.
- 784 54. **Neufeldt CJ, Joyce MA, Levin A, Steenbergen RH, Pang D, Shields J, Tyrrell**  
785 **DL, Wozniak RW.** 2013. Hepatitis C virus-induced cytoplasmic organelles use  
786 the nuclear transport machinery to establish an environment conducive to virus  
787 replication. *PLoS Pathog* **9**:e1003744.
- 788 55. **Spuul P, Balistreri G, Kaariainen L, Ahola T.** 2010. Phosphatidylinositol 3-  
789 kinase-, actin-, and microtubule-dependent transport of Semliki Forest Virus  
790 replication complexes from the plasma membrane to modified lysosomes. *J Virol*  
791 **84**:7543-7557.

---

Persistence of NsP3 during Stable CHIKV Replication

---

- 792 56. **Reineke LC, Dougherty JD, Pierre P, Lloyd RE.** 2012. Large G3BP-induced  
793 granules trigger eIF2alpha phosphorylation. *Mol Biol Cell* **23**:3499-3510.
- 794 57. **Kedersha N, Stoecklin G, Ayodele M, Yacono P, Lykke-Andersen J, Fritzler**  
795 **MJ, Scheuner D, Kaufman RJ, Golan DE, Anderson P.** 2005. Stress granules  
796 and processing bodies are dynamically linked sites of mRNP remodeling. *J Cell*  
797 *Biol* **169**:871-884.
- 798 58. **Kedersha N, Cho MR, Li W, Yacono PW, Chen S, Gilks N, Golan DE,**  
799 **Anderson P.** 2000. Dynamic shuttling of TIA-1 accompanies the recruitment of  
800 mRNA to mammalian stress granules. *J Cell Biol* **151**:1257-1268.
- 801 59. **Gretton SN, Taylor AI, McLauchlan J.** 2005. Mobility of the hepatitis C virus  
802 NS4B protein on the endoplasmic reticulum membrane and membrane-  
803 associated foci. *J Gen Virol* **86**:1415-1421.
- 804 60. **Jones DM, Gretton SN, McLauchlan J, Targett-Adams P.** 2007. Mobility  
805 analysis of an NS5A-GFP fusion protein in cells actively replicating hepatitis C  
806 virus subgenomic RNA. *J Gen Virol* **88**:470-475.
- 807 61. **Wolk B, Buchele B, Moradpour D, Rice CM.** 2008. A dynamic view of hepatitis  
808 C virus replication complexes. *J Virol* **82**:10519-10531.
- 809 62. **Nakabayashi H, Taketa K, Miyano K, Yamane T, Sato J.** 1982. Growth of  
810 human hepatoma cells lines with differentiated functions in chemically defined  
811 medium. *Cancer Res* **42**:3858-3863.

---

Persistence of NsP3 during Stable CHIKV Replication

---

- 812 63. **Bodor DL, Rodriguez MG, Moreno N, Jansen LE.** 2012. Analysis of protein  
813 turnover by quantitative SNAP-based pulse-chase imaging. *Curr Protoc Cell Biol*  
814 **Chapter 8:Unit8 8.**
- 815 64. **Curd A, Cleasby A, Makowska K, York A, Shroff H, Peckham M.** 2015.  
816 Construction of an instant structured illumination microscope. *Methods* **88**:37-47.
- 817 65. **White JP, Cardenas AM, Marissen WE, Lloyd RE.** 2007. Inhibition of  
818 cytoplasmic mRNA stress granule formation by a viral proteinase. *Cell Host*  
819 *Microbe* **2**:295-305.
- 820 66. **de Chaumont F, Dallongeville S, Chenouard N, Herve N, Pop S, Provoost T,**  
821 **Meas-Yedid V, Pankajakshan P, Lecomte T, Le Montagner Y, Lagache T,**  
822 **Dufour A, Olivo-Marin JC.** 2012. Icy: an open bioimage informatics platform for  
823 extended reproducible research. *Nat Methods* **9**:690-696.
- 824  
825  
826  
827  
828  
829  
830  
831  
832  
833

## 834 **Figure Legends**

835 **Figure 1.** NsP3 has a granular distribution in stable CHIKV cells and infected HuH-7  
836 cells. Top panels: Sub-diffraction confocal microscopy of BG-647-SiR-labeled, imaged  
837 in far-red channel. Stable CHIKV cells were chemically fixed and stained with  
838 fluorescent BG-647 SiR, which irreversibly binds SNAP-tagged proteins. For CHIKV  
839 infection studies, naïve HuH-7 were infected with viral stocks of CHIKV<sup>SNAP-P3</sup> or  
840 CHIKV<sup>ZsGreen-P3</sup> at an MOI of 10. For cells infected CHIKV<sup>ZsGreen-P3</sup>, no additional  
841 labelling was necessary and images were acquired in the green channel. Data shown  
842 are maximum-intensity-projections of Z-stacks acquired on an Airyscan confocal  
843 system, operated in the super-resolution mode. To enhance the appearance of dim  
844 structures, Icy software (66) was used to pseudo-color image channels with the pre-  
845 defined look-up-table “Fire” based on pixel intensity. Color bars indicate the relative  
846 range of pixel intensity (white=high, purple=low, from 0 arbitrary units to 1). Nuclear  
847 counterstain (gray) was overlaid as a reference. Images displayed in the ‘Fire’ view,  
848 based on a logarithmic scale (“Log Scale”), illustrate both high-intensity and low-  
849 intensity granules in the same image.

850 **Figure 2.** Characterization of nsP3-G3BP interaction by sub-diffraction microscopy.  
851 SNAP-nsP3 (cyan) was stained with BG-647 SiR as in Fig. 1 and G3BP2 (magenta)  
852 was immunostained with rabbit antibodies that bind to G3BP2 and secondary anti-  
853 rabbit IgG antibodies conjugated to Alexa 594. Stable CHIKV cells constitutively  
854 expressed ZsGreen (green). Nuclei were counterstained with DAPI (yellow). Images  
855 were acquired by Airyscan microscopy operated in super-resolution mode. Top panel

## Persistence of nsP3 during Stable CHIKV Replication

---

856 shows an overview of the imaged cell with boxed regions-of-interest (ROIs) that are  
857 magnified in lower panels (ROI No. 1-6). Overlaps between cyan and magenta layers  
858 appear in white (Overlay). Intensity maps were created in Icy software and represent  
859 relative pixel intensity according to colormap 'Jet'. For high-contrast display of nsP3-  
860 granules, contrast was optimized within each image by adjusting the view range in the  
861 histogram viewer window of Icy software. Outlines of the extracted ROIs that were used  
862 for bioimage analysis are shown in grayscale. Intensity: the average intensity  
863 distribution in the nsP3 channel inside the ROI (in arbitrary units). Feret: maximum Feret  
864 diameter, the maximum distance between any 2 points of the surface. Images represent  
865 single slices, which were extracted from Z-stacks.

866 **Figure 3.** Four-color microscopy of nsP3, dsRNA, nsP1 and ZsGreen. Stable CHIKV  
867 cells were fixed and probed for nsP3 (cyan), dsRNA (magenta), nsP1 (nsP1), and  
868 ZsGreen (green) by a combination of SNAP-tag labeling and indirect  
869 immunofluorescence assays. Images were taken with an Airyscan microscope  
870 operated in super-resolution mode. Zoomed-in views taken from Fig. S2B are shown  
871 here in panels labeled according to individual cell (Cell 1-3) and ROI (ROI 1-2). Overlay  
872 images are a combination of the nsP3, nsP1 and dsRNA layers as indicated. The  
873 zoomed-out ZsGreen channel is shown as a separate reference with the corresponding  
874 ROI marked by a white box. Arrowheads indicate regions of proximity between nsP3,  
875 dsRNA, and nsP1.

876 **Figure 4.** Cellular structures associated with nsP3-granules. Fixed, stable replicon cells  
877 were examined for presence of nsP3 and cellular markers by indirect  
878 immunofluorescence. The magnified regions-of-interest were derived from imaged cells



## Persistence of NsP3 during Stable CHIKV Replication

---

879 for which overviews are provided as a reference in the supplemental material alongside  
880 corresponding DAPI and ZsGreen layers (Fig. S3). To enhance the appearance of dim  
881 structures, single-channel images of nsP3 or Nup98 were both displayed with the “Fire”  
882 colormap in Icy software. To distinguish the two channels in overlay images (“nsP3 +  
883 “Respective Cellular Marker”), the nsP3-layer was pseudocolored in cyan. Arrowheads  
884 serve as digital fiducial markers and point towards regions where nsP3 is associated  
885 with a cellular structure. Dashed lines for Cell 8 indicate the nuclear membrane and  
886 were drawn according to DAPI images (Fig. S3). Images are single slices extracted  
887 from Z-stacks that were taken with an Airyscan microscope operated in super-  
888 resolution mode.

889 **Figure 5.** Live imaging of SNAP-nsP3 in stable CHIKV cells showing movement  
890 patterns of nsP3-granules. A. Live cells were labeled with BG-647 SiR and examined  
891 with an inverted ZEISS LSM 700 confocal laser scanning microscope. A time-lapse  
892 series was acquired in the far-red channel (SNAP-nsP3) at intervals of 8.2 s for 20  
893 cycles (=155 s). Overview images on the left represent the first images of the recordings  
894 included as Movie S1 in the supplemental material. Positions of individual granules  
895 were tracked from frame-to-frame and overlaid on the first image of the recording  
896 (“Overview + Tracks”). Numbers 1-9 correspond to track numbers. Closed arrowheads  
897 mark granules with higher displacement than that of granules marked by open  
898 arrowheads. Single-channel image of SNAP-nsP3 is pseudocolored according to  
899 predefined colormap ‘Fire’ in Icy software. A median filter was applied to remove  
900 background pixels. The insets depict the paths of SNAP-nsP3 granules in two ROIs.  
901 Total displacement of the tracked granule are shown. B. Live imaging of SNAP-nsP3 in

## Persistence of NsP3 during Stable CHIKV Replication

---

902 stable CHIKV cells by instant structured illumination microscopy (iSIM). Entire recording  
903 along with zoomed-in views is also included in Movie S2. The 2-D time-lapse series  
904 consisted of 100 frames. Images were acquired at intervals of 1080 msec. Closed  
905 arrowheads mark static structures, open arrowheads mark motile structures.  
906 Displacement: the sum of all consecutive displacements in each track, which  
907 corresponds to the total distance travelled by the granule.

908 **Figure 6.** Static internal architecture of nsP3-granules. A. HuH-7 cells were transfected  
909 with GFP-G3BP1 plasmid. At 48h post-transfection, cells were examined by live cell  
910 imaging with an LSM700 microscope with a Plan-Apochromat 63x NA 1.4 Oil objective.  
911 Field-of-views with cells overexpressing GFP-G3BP granules were selected. Scan  
912 zoom was set to a factor of 6.6. Images of cells were recorded every 250 ms. Circular  
913 regions (circles) were bleached with 488-nm laser pulses after two cycles of imaging.  
914 Areas overlapped with part of a large G3BP-granule or an entire granule. A reference  
915 area was included that was not photobleached. Grayscale image (left) provides  
916 overview of bleached regions (circles). Circle color corresponds to lines in adjacent  
917 graphs (right), which plot the mean fluorescence intensity within each bleached area  
918 over time. Blue circle marks the unbleached control region. Intensity is measured in  
919 arbitrary units (A.U.). B. FRAP of stable CHIKV cells stained with BG-TMR-*Star*. The  
920 same settings shown in A were used, except for bleaching with the 555-nm laser line  
921 instead of 488-nm.

922 **Figure 7.** A. Cell lysates from stable CHIKV cells. Live cells were stained with BG-TMR-  
923 *Star* and lysed with Glasgow Lysis buffer. The lysate was then bound to plastic chamber

---

Persistence of NsP3 during Stable CHIKV Replication

---

924 slides overnight and imaged the following day. Images were acquired with an LSM880  
925 microscopy operated in standard confocal mode. B. Confocal imaging of stable CHIKV  
926 cells passaged in the absence of puromycin. Cell population was made up of a mixture  
927 of ZsGreen-positive and ZsGreen-negative cells, which only appear in the absence of  
928 puromycin. To induce cellular stress granules, sodium arsenite was added for 30 min.  
929 Cells were fixed, then stained for SNAP-nsP3 and G3BP2. Stained cells were imaged  
930 by standard confocal microscopy. ROI1 is centered on a cell expressing ZsGreen,  
931 whereas ROI2 focuses on a cell that is ZsGreen-negative. Cell boundaries appearing as  
932 dashed white lines were drawn based on green auto-fluorescence of the cell (only seen  
933 when overexposing green channel).

934

935

936

937

938

939

940

941

942

943 **Supplemental Material**

944 **Text S1.** Supplemental text.

945 **Text S2.** Supplemental methods and materials.

946 **Table S1.** Viral titers of CHIKV<sup>SNAP-P3</sup> and CHIKV<sup>ZsGreen-P3</sup>.

947 **Table S2.** Quantitation of tracks.

948 **Fig. S1. Comparison of confocal with Airyscan images.** Airyscan provided improved  
949 resolution and signal-to-noise ratios (SNRs), allowing us to spot clusters of nsP3 inside  
950 stable CHIKV cells with unprecedented sensitivity. This is most apparent in  
951 magnifications of nsP3- and G3BP2-clusters. Airyscan was able to image faint clusters  
952 that did not resolve well with standard confocal microscopy. Whereas some clusters  
953 appear to be just one object in the confocal images, Airyscan images confirmed the  
954 presence of two clusters close together (ROI 1, nsP3). In this paper, we use the term  
955 “granules” for these protein clusters. Airyscan also revealed sub-structures within large  
956 granules that were not apparent with confocal imaging. Samples were prepared as  
957 described for Fig. 2.

958 **Fig. S2 Subcellular localization of SNAP-nsP3 during CHIKV<sup>SNAP-P3</sup> infection and**  
959 **overview of fluorescence staining (SNAP-nsP3, dsRNA, nsP3) in stable CHIKV**  
960 **cells.** (A) Samples were prepared and imaged as described in Fig. 1 by Airyscan  
961 microscopy. Maximum-intensity-projections of Z-stacks acquired with Airyscan  
962 microscopy. NsP3-channel was pseudocolored with the look-up-table “Fire” in Icy  
963 software. Nuclear counterstain (gray) was overlaid as reference. Images displayed in  
964 the ‘Fire’ view, based on a logarithmic scale (“Log Scale”), illustrate both high-

---

Persistence of NsP3 during Stable CHIKV Replication

---

965 intensity and low-intensity structures in the same image. (B) Reference overviews of  
966 stable CHIKV cells that were imaged with four-color Airyscan microscopy. Samples  
967 were prepared and imaged as described for Fig. 3. SNAP-nsP3 signal was  
968 pseudocolored with a cyan look-up table and displayed on a logarithmic scale (“Log  
969 Scale”) to illustrate both high-intensity and low-intensity structures in the same image.  
970 Boxed regions were magnified in Fig. 3.

971 **Fig. S3 Overview of fluorescence staining (SNAP-nsP3 and cytoskeleton, Rab5,**  
972 **Nup98) of stable CHIKV cells.** Reference overviews of stable CHIKV cells that were  
973 imaged with four-color Airyscan microscopy. Samples were prepared and imaged as  
974 described for Fig. 4. SNAP-nsP3 signal was pseudocolored with a cyan look-up table  
975 and displayed on a logarithmic scale (“Log Scale”) to illustrate both high-intensity and  
976 low-intensity structures in the same image. Boxed regions were magnified in Fig. 3.

977 **Fig. S4 A. Long-term imaging of SNAP-nsP3, live-cell confocal microscopy, and**  
978 **quench-pulse-chase of stable CHIKV cells.** (A) Stable CHIKV cells were plated in  
979 glass bottom dishes. Labeling with BG-SiR was carried out the following day. Cells  
980 were imaged with a Delta Vision Widefield Deconvolution Microscope with the  
981 incubator box set to 37°C. After images were acquired for respective time point, cells  
982 were returned to regular cell-culture incubators. After 24 and 48 hours, the same grid  
983 positions were found using transmission images and fluorescent signals were imaged  
984 with the same settings as the 0-h time point. (B) Live-cell confocal microscopy of stable  
985 CHIKV cells. Stable CHIKV cells were plated in glass bottom dishes. The following day,  
986 SNAP-nsP3 was labeled with BG-SiR and mitochondria were stained with MitoTracker  
987 Red FM. Cells were imaged on an LSM700 AxioObserver inverted confocal microscope

## Persistence of NsP3 during Stable CHIKV Replication

---

988 (ZEISS) equipped with Plan-Apochromat 63x/1.4 Oil Ph3 M27 objective and an  
989 incubator box and heated stage set to 37°C; Z-stacks (11-13 Slices) were acquired  
990 every 30 min for a total duration of 2 hours. ZsGreen was pseudo-colored in yellow to  
991 contrast the cyan overlay of nsP3 and magenta overlay of mitochondria. (C) Quench-  
992 pulse-chase experiment. Stable CHIKV cells were plated in 24-well plates containing  
993 glass coverslips. The next day, non-fluorescent bromothenylpteridine was used to block  
994 the reactivity of intracellular SNAP-nsP3. Blocked cells were fixed with 4%  
995 formaldehyde at indicated times post-block (0 h, 1 h, 24 h) and newly synthesized  
996 SNAP-nsP3 was stained with BG-SiR post-fixation. Stained samples were imaged with  
997 a LSM880 system (ZEISS) operated in confocal mode. One representative field-of-view  
998 (FOV) is shown from each sample. The same laser power and detector settings were  
999 used to image each FOV. Z-stacks were acquired to capture all the granules present  
1000 within cells. Images are maximum-intensity projections. SNAP-nsP3 channel was  
1001 pseudocolored with the 'Fire' look-up table.

1002 **Fig. S5. FRAP of EGFP-G3BP1 and SNAP-nsP3.** Individual images of FRAP  
1003 experiment shown in Fig. 5. (A) Single-channel images of G3BP and (B) of SNAP-nsP3  
1004 were pseudocolored according to predefined colormap 'Fire' in Icy software. Boxed  
1005 regions were magnified within insets ('Zoom').

1006 **Movie S1. Time-lapse of SNAP-nsP3 in stable CHIKV cells by standard confocal**  
1007 **microscopy and instant structured illumination microscope.** Time-lapse movie of  
1008 ZsGreen (green), MitoTracker Red FM (magenta), and BG-SiR staining of SNAP-nsP3  
1009 (fire) in stable CHIKV cells. Individual frames from these live-cell recordings are shown  
1010 in Fig. 5A. This is followed by a time-lapse movie of ZsGreen (green) and BG-TMR-Star

---

Persistence of NsP3 during Stable CHIKV Replication

---

1011 staining of SNAP-nsP3 (fire) in stable CHIKV cells by iSIM. Images were taken every  
1012 1080 msec for 100 cycles, alternating in the green and red channel. Individual frames  
1013 from these live-cell recordings are shown in Fig. 5B.

1014

1015

1016

1017

1018

1019

1020



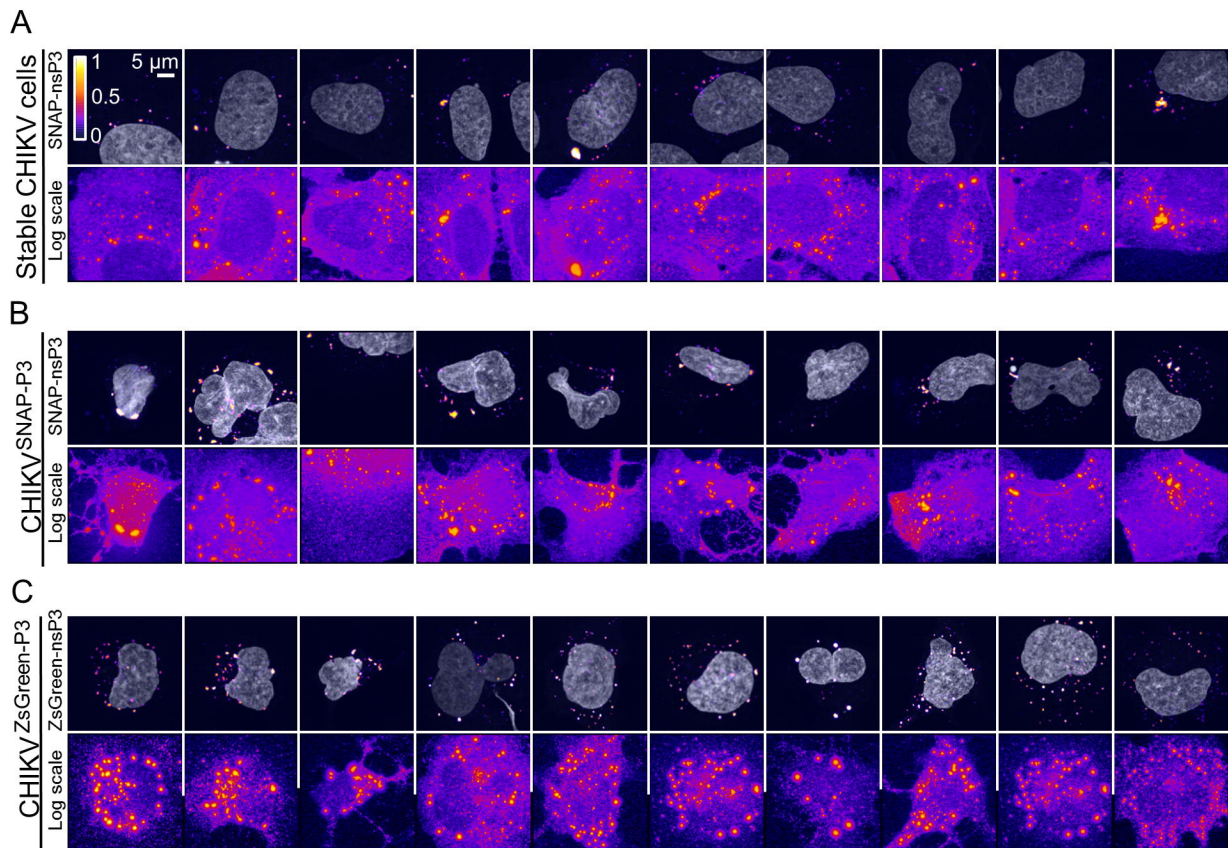

Figure 1.



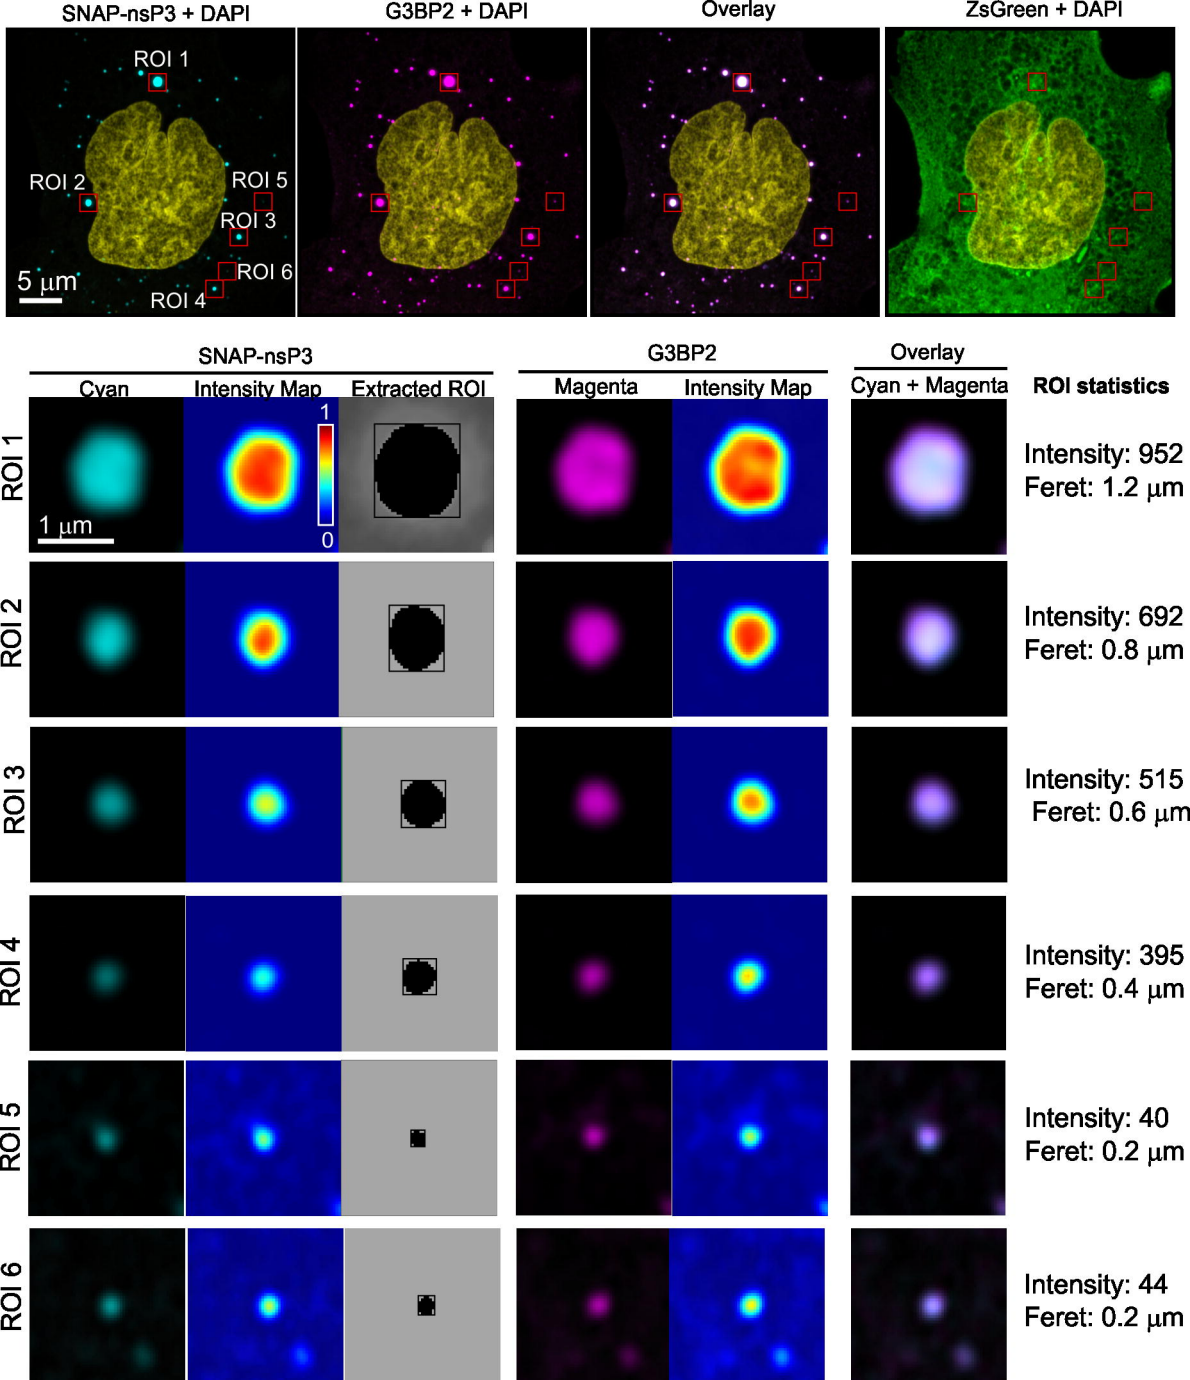

Figure 2.

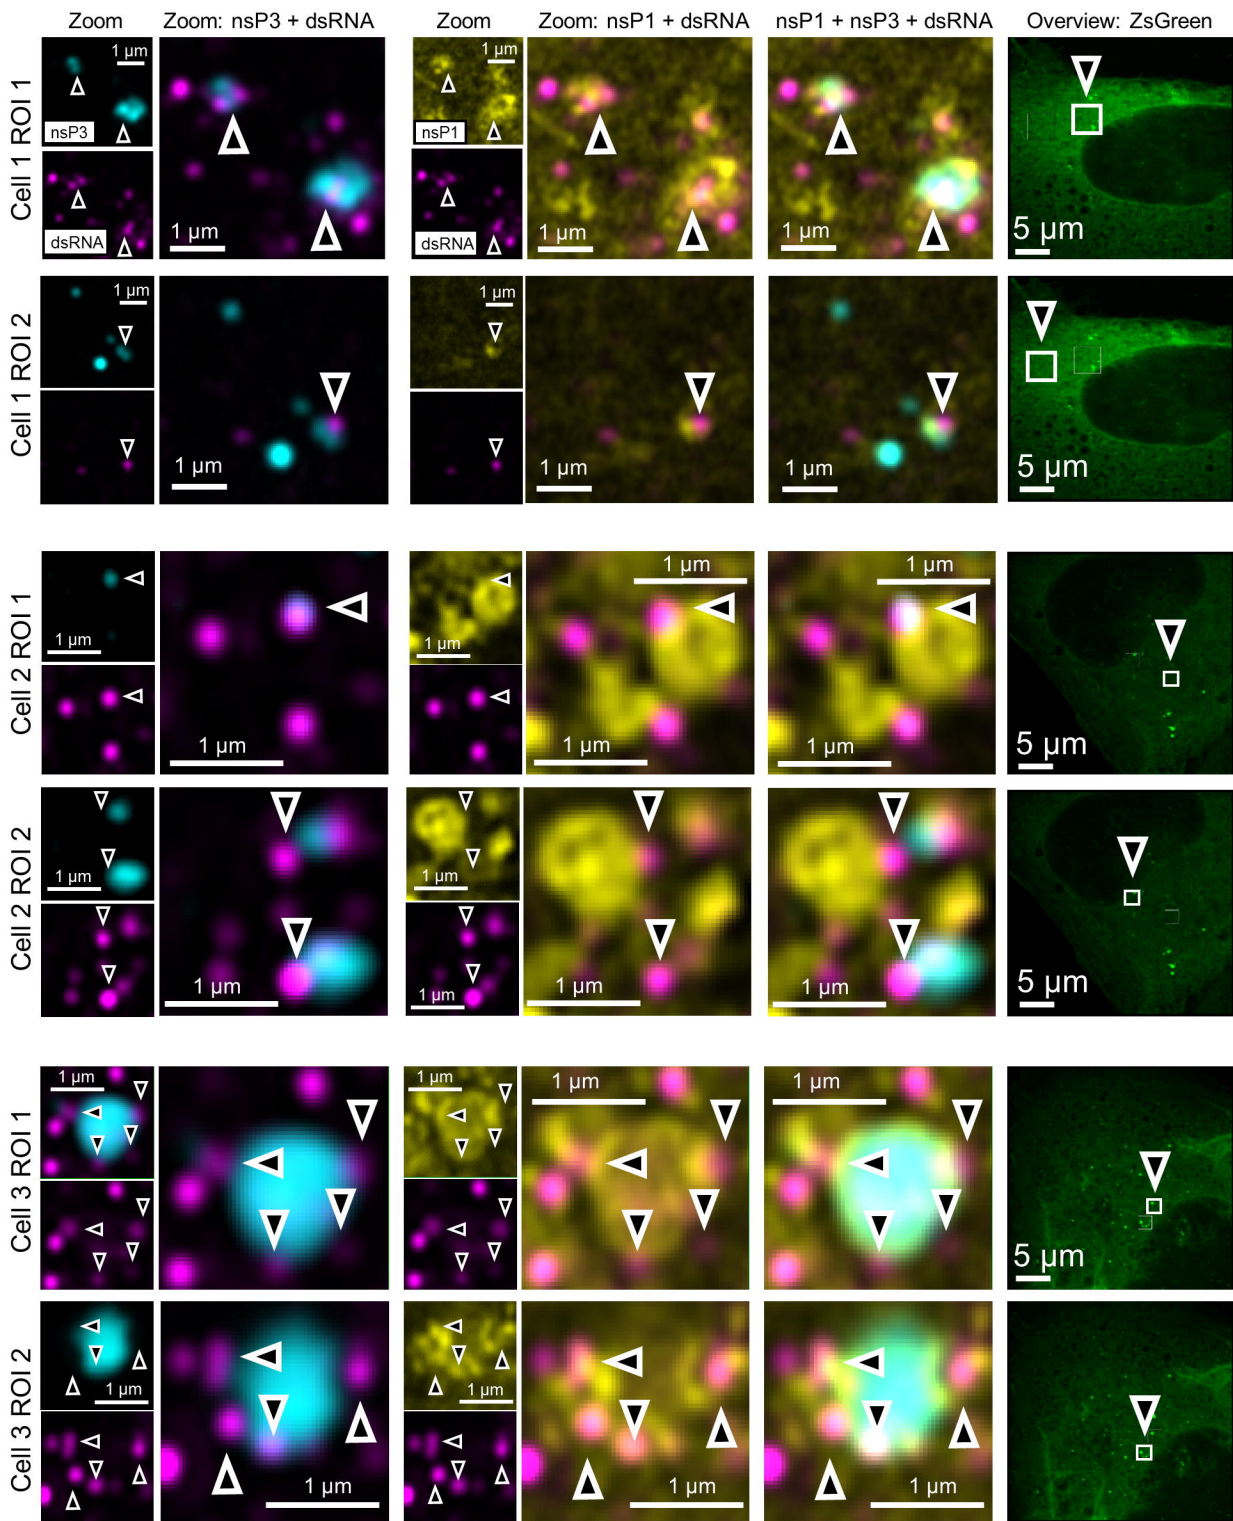

Figure 3.



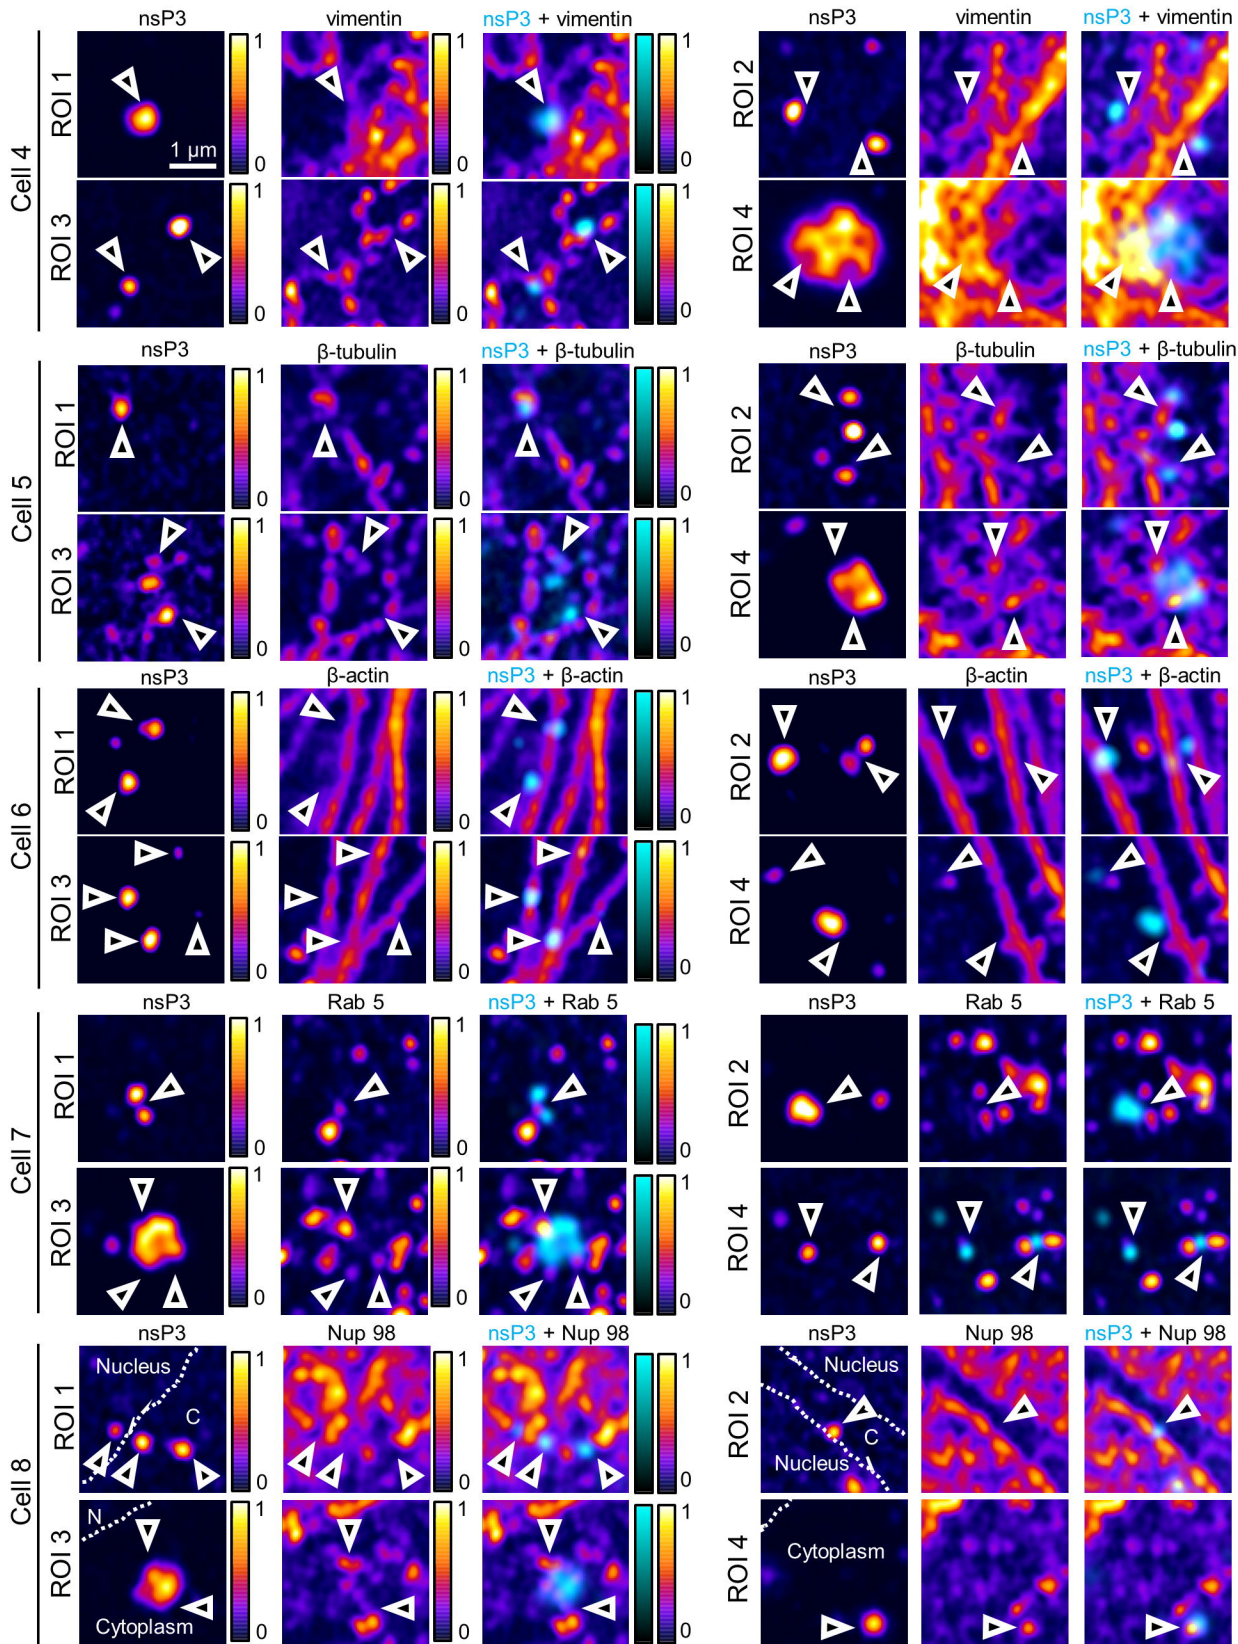

Figure 4.

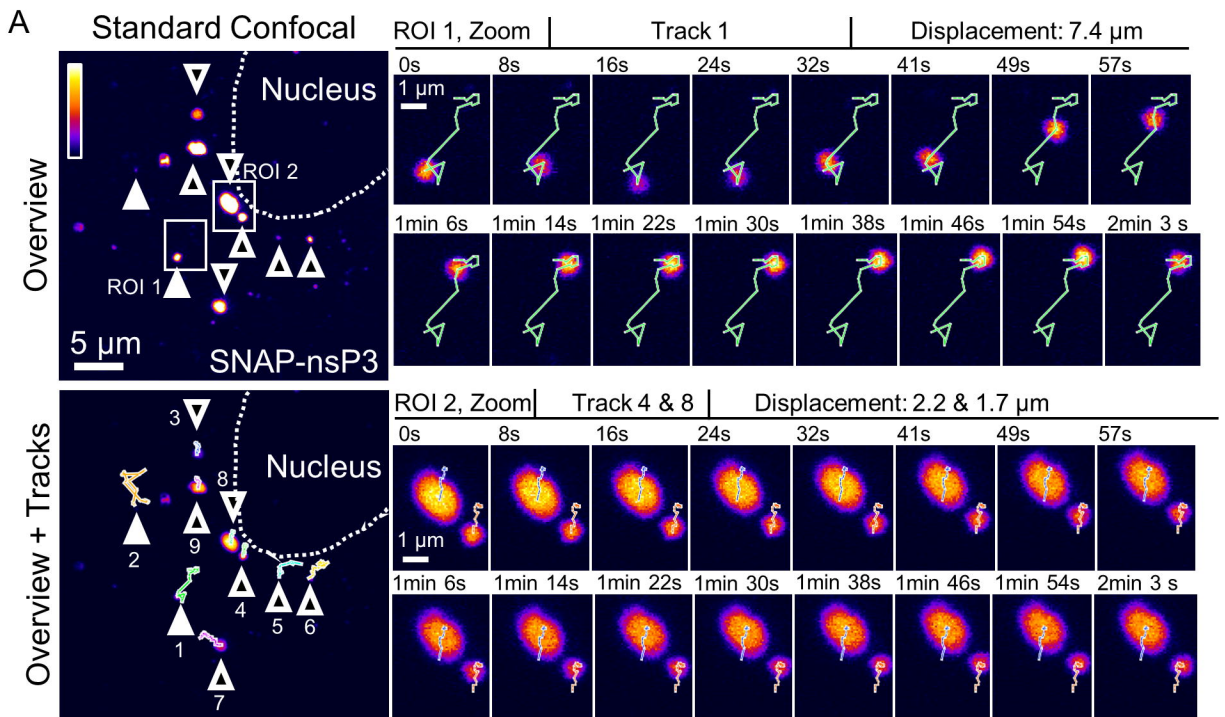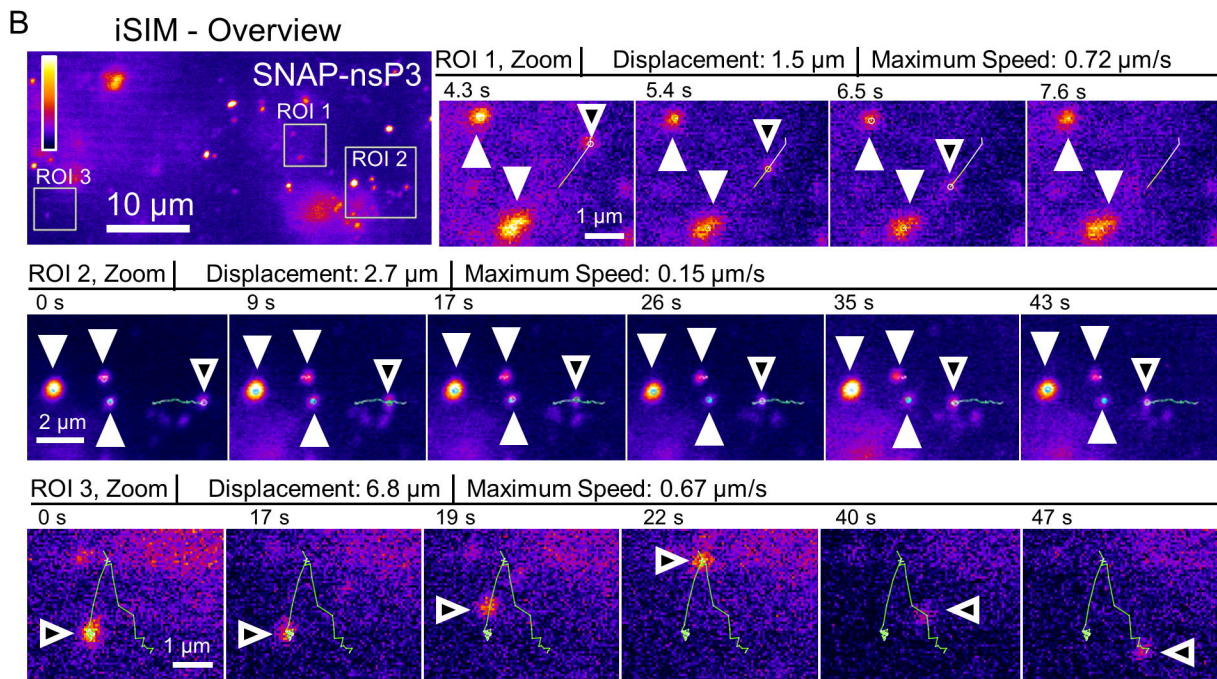

Figure 5.



A

EGFP-G3BP1:

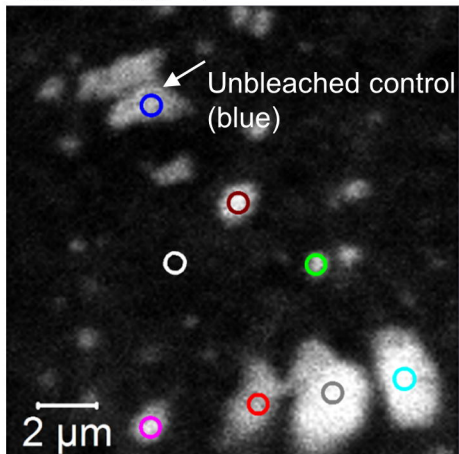

Intensity (A.U.)

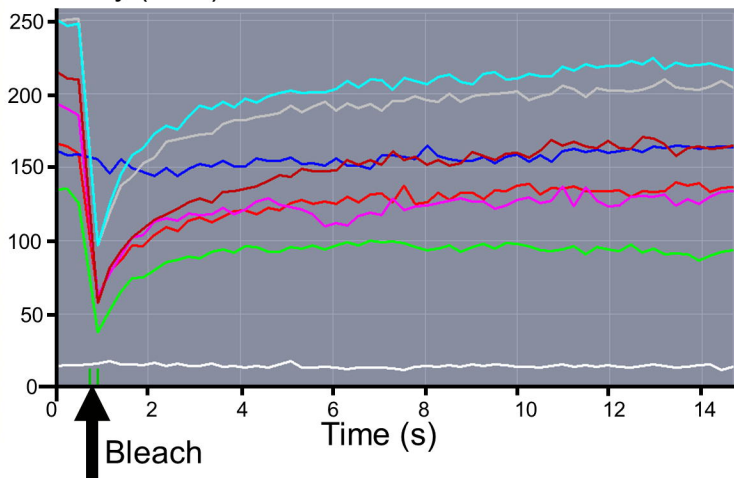

B

BG-TMR-Star SNAP-nsP3:

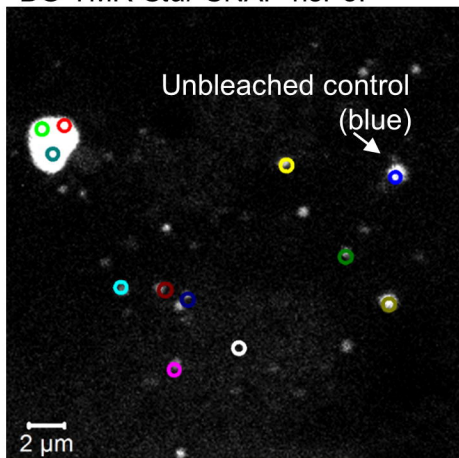

Intensity (A.U.)

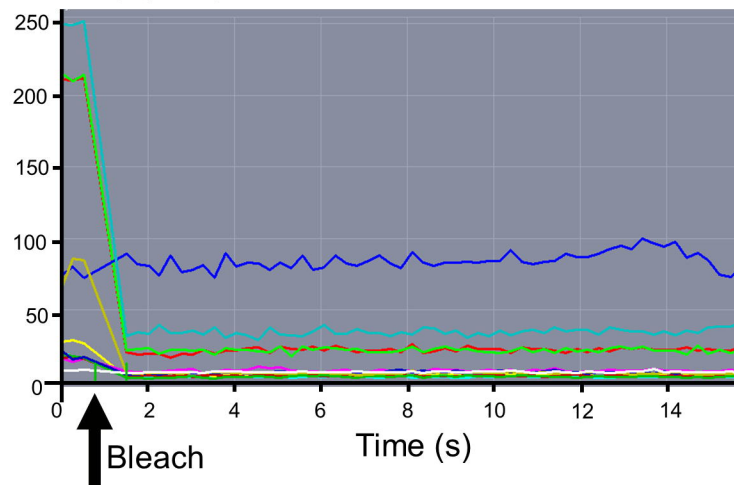

Figure 6.

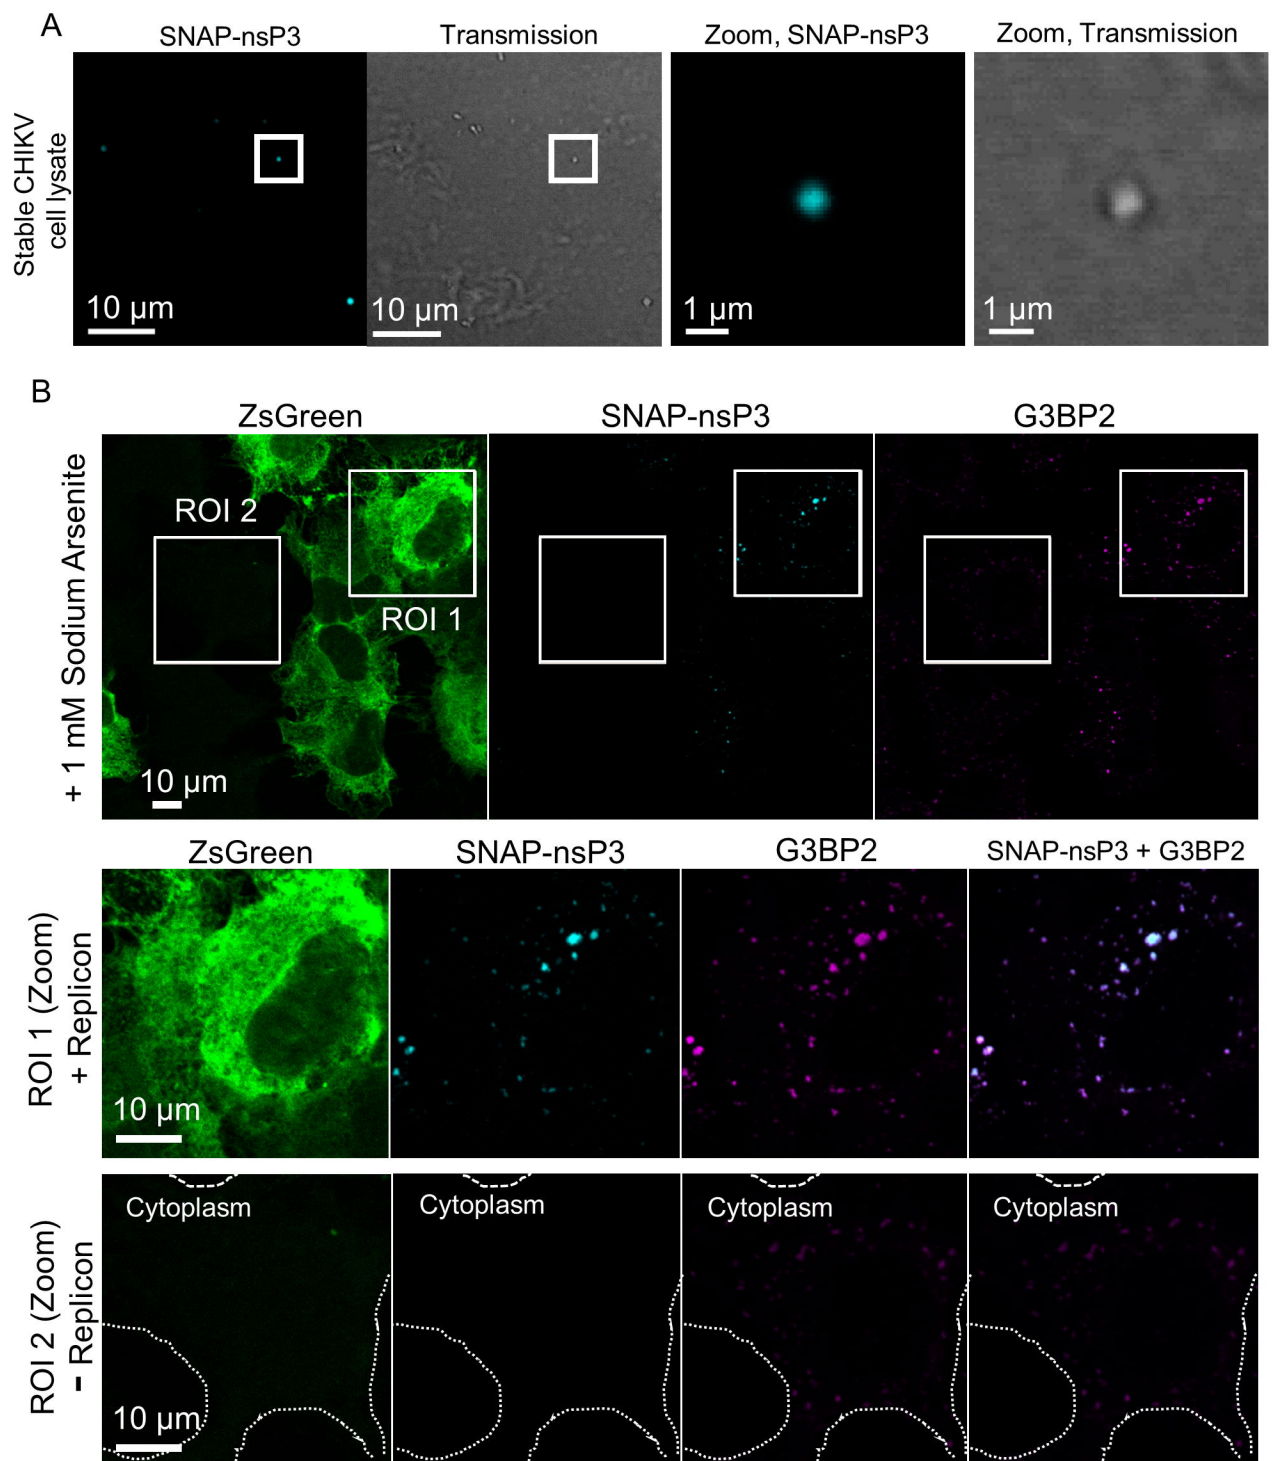

Figure 7.
